# Supplementary material for: Complementary biochemical approaches applied to the identification of plastidial calmodulin-binding proteins
Source: Royal Society of Chemistry journal article supplement (doi:10.1039/c3mb00004d), 2013-03-12
Supplement: c3mb00004d.xlsx [file c3mb00004d.xlsx]

## Sheet: complete list
Accession	Description	Found in (sample):			# peptides in:			Total spectral count in At_Chloro	Location (TAIR)	cTP (ChloroP)	TargetP (PPDB)	Curated Location (PPDB)	Aramemnon (PPDB)	TMHMM (PPDB)	Calc.MW (PPDB)	Calc.PI (PPDB)	Length (nb of aa)	ProteomicsPub. (PPDB)	GFP/YFP loc. (PPDB)
		Arabidopsis stroma	Arabidopsis membranes	Spinach stroma/env	Arabidopsis stroma	Arabidopsis membranes	Spinach stroma/env
At1g15820	LHCB6 (LIGHT HARVESTING COMPLEX PSII SUBUNIT 6); chlorophyll binding	no	Yes	no	0	2	0	631	thylakoid membrane (sensu Viridiplantae)	Y	M	thylakoid-integral	2	0	27.52	6.75	258	15028209(Total chloroplast); 12766230(Total chloroplast envelope); 14729914(thylakoid stripped); 15322131(Thylakoid-stripped);	-
At4g10340	LHCB5 (LIGHT HARVESTING COMPLEX OF PHOTOSYSTEM II 5); chlorophyll binding	no	Yes	no	0	3	0	783	thylakoid membrane (sensu Viridiplantae) & chloroplast stromal thylakoid & PSII associated light-harvesting complex II	Y	C	thylakoid-integral	2	0	30.15	5.99	280	15028209(Total chloroplast); 14729914(thylakoid stripped); 15322131(Thylakoid-stripped);	-
At3g08940	LHCB4.2 (light harvesting complex PSII); chlorophyll binding	no	Yes	no	0	2	0	380	thylakoid membrane (sensu Viridiplantae)	Y	C	thylakoid-integral	-	0	31.19	5.85	287	15028209(Total chloroplast); 12938931(Total chloroplast envelope); 14729914(thylakoid stripped); 15322131(Thylakoid-stripped);	-
At5g01530	chlorophyll A-B binding protein CP29 (LHCB4)	no	Yes	no	0	4	0	762	thylakoid membrane (sensu Viridiplantae)	Y	C	thylakoid-integral	2	0	31.14	5.76	290	15028209(Total chloroplast); 14729914(thylakoid stripped); 15322131(Thylakoid-stripped);	-
At4g05180	PSBQ-2; calcium ion binding	no	Yes	no	0	7	0	334	thylakoid membrane (sensu Viridiplantae) & thylakoid lumen (sensu Viridiplantae)	Y	C	thylakoid-peripheral-lumenal-side	-	0	24.64	9.72	230	15028209(Total chloroplast); 11719511(Thylakoid lumen proteome); 14729914(thylakoid-pheripheral&lumen); 14729914(thylakoid stripped); 11826309(thylakoid peripheral&lumen); 15322131(Thylakoid-stripped); 15815986(Silique); 15815986(seedling); 15815986(Leaf)	-
At5g66570	PSBO1 (PS II OXYGEN-EVOLVING COMPLEX 1); oxygen evolving/ poly(U) binding	no	Yes	no	0	2	0	625	thylakoid membrane (sensu Viridiplantae) & thylakoid lumen (sensu Viridiplantae)	Y	C	thylakoid-peripheral-lumenal-side	-	0	35.14	5.54	332	15028209(Total chloroplast); 11719511(Thylakoid lumen proteome); 14729914(thylakoid-pheripheral&lumen); 14729914(thylakoid stripped); 11826309(thylakoid peripheral&lumen); 15322131(Thylakoid-stripped); 16207701(chloroplast stroma); 16923014(cold-stress re	-
At1g06680	PSBP-1 (PHOTOSYSTEM II SUBUNIT P-1); poly(U) binding	no	Yes	no	0	2	0	325	thylakoid membrane (sensu Viridiplantae) & thylakoid lumen (sensu Viridiplantae) & thylakoid (sensu Viridiplantae) & extrinsic to membrane	Y	C	thylakoid-peripheral-lumenal-side	-	0	28.09	6.9	263	15028209(Total chloroplast); 12938931(Total chloroplast envelope); 11719511(Thylakoid lumen proteome); 14729914(thylakoid-pheripheral&lumen); 14729914(thylakoid stripped); 11826309(thylakoid peripheral&lumen); 15322131(Thylakoid-stripped); 16207701(chloro	-
At1g03600	photosystem II family protein	no	Yes	no	0	1	0	59	thylakoid membrane (sensu Viridiplantae) & thylakoid lumen (sensu Viridiplantae)	Y	C	thylakoid-peripheral-lumenal-side	-	0	18.83	9.88	174	15028209(Total chloroplast); 14729914(thylakoid-pheripheral&lumen); 14729914(thylakoid stripped); 11826309(thylakoid peripheral&lumen); 15322131(Thylakoid-stripped); 15815986(Silique);	-
At4g21280	oxygen-evolving enhancer protein 3, chloroplast, putative (PSBQ1) (PSBQ)	no	Yes	no	0	8	0	314	thylakoid membrane (sensu Viridiplantae) & thylakoid lumen (sensu Viridiplantae)	Y	C	thylakoid-peripheral-lumenal-side	-	0	23.79	9.64	223	15028209(Total chloroplast); 11719511(Thylakoid lumen proteome); 14729914(thylakoid-pheripheral&lumen); 14729914(thylakoid stripped); 11826309(thylakoid peripheral&lumen); 15322131(Thylakoid-stripped); 16207701(chloroplast stroma); 15815986(Silique); 1581	-
At1g14150	oxygen evolving enhancer 3 (PsbQ) family protein	no	Yes	no	0	2	0	8	thylakoid membrane (sensu Viridiplantae) & thylakoid lumen (sensu Viridiplantae)	Y	C	thylakoid-peripheral-lumenal-side	-	0	22.15	8.79	190	15028209(Total chloroplast); 14729914(thylakoid stripped); 15322131(Thylakoid-stripped);	-
At3g47470	LHCA4 (LIGHT-HARVESTING CHLOROPHYLL-PROTEIN COMPLEX I SUBUNIT A4); chlorophyll binding	no	Yes	no	0	1	0	319	thylakoid membrane (sensu Viridiplantae)	Y	C	thylakoid-integral	-	0	27.73	6.21	251	15028209(Total chloroplast); 12766230(Total chloroplast envelope); 14729914(thylakoid stripped); 15322131(Thylakoid-stripped);	-
At5g64040	PSAN; calmodulin binding	no	Yes	no	0	8	0	224	thylakoid membrane (sensu Viridiplantae) & thylakoid lumen (sensu Viridiplantae) & photosystem I	Y	C	thylakoid-peripheral-lumenal-side	-	0	18.42	9.11	171	15028209(Total chloroplast); 14729914(thylakoid-pheripheral&lumen); 14729914(thylakoid stripped); 11826309(thylakoid peripheral&lumen); 15322131(Thylakoid-stripped);	-
At1g52230	PSAH2 (PHOTOSYSTEM I SUBUNIT H2)	no	Yes	no	0	1	0	246	thylakoid membrane (sensu Viridiplantae)	Y	C	thylakoid-integral	-	0	15.27	9.89	145	15028209(Total chloroplast); 14729914(thylakoid stripped); 15322131(Thylakoid-stripped);	-
At1g31330	PSAF (photosystem I subunit F)	no	Yes	no	0	2	0	316	thylakoid membrane (sensu Viridiplantae)	Y	C	thylakoid-integral	2	1	24.17	9.57	221	15028209(Total chloroplast); 12938931(Total chloroplast envelope); 14729914(thylakoid stripped); 15322131(Thylakoid-stripped);	-
At4g03280	PETC (PHOTOSYNTHETIC ELECTRON TRANSFER C); electron transporter, transferring electrons from cytochrome b6/f complex of photosystem II	no	Yes	no	0	1	0	84	thylakoid membrane (sensu Viridiplantae) & cytochrome b6f complex	Y	C	thylakoid-peripheral-lumenal-side	1	1	24.36	8.8	229	15028209(Total chloroplast); 12766230(Total chloroplast envelope); 15060130(Plasma Membrane proteome); 14729914(thylakoid-pheripheral&lumen); 14729914(thylakoid stripped); 15322131(Thylakoid-stripped); 15815986(Silique); 15734904(S-nitrosylated suspension	-
AtCG00540	Encodes cytochrome f apoprotein; involved in photosynthetic electron transport chain; encoded by the chloroplast genome and is transcriptionally repressed by a nuclear gene HCF2.	no	Yes	no	0	11	0	301	thylakoid membrane (sensu Viridiplantae) & cytochrome b6f complex	-	C	thylakoid-integral	-	2	35.35	8.34	320	14729914(thylakoid stripped); 15322131(Thylakoid-stripped);	-
AtCG00130	ATPase F subunit.	no	Yes	no	0	1	0	412	thylakoid membrane (sensu Viridiplantae) & chloroplast & hydrogen-translocating F-type ATPase complex	-	C	thylakoid-integral	-	1	21.05	7.84	184	14729914(thylakoid stripped); 15322131(Thylakoid-stripped);	-
At4g09650	ATPD (ATP SYNTHASE DELTA-SUBUNIT GENE); hydrogen ion transporting ATP synthase, rotational mechanism / proton-transporting ATPase, rotational mechanism	no	Yes	no	0	1	0	175	thylakoid membrane (sensu Viridiplantae)	Y	C	thylakoid-peripheral-stromal-side	-	0	25.66	9.04	234	15028209(Total chloroplast); 12938931(Total chloroplast envelope); 14729914(thylakoid-pheripheral&lumen); 14729914(thylakoid stripped); 11826309(thylakoid peripheral&lumen); 15322131(Thylakoid-stripped); 16923014(cold-stress responsive chloroplast); 15815	-
AtCG00480	chloroplast-encoded gene for beta subunit of ATP synthase	Yes	Yes	no	2	16	0	2300	thylakoid membrane (sensu Viridiplantae) & proton-transporting ATP synthase, catalytic core (sensu Eukaryota)	-	C	thylakoid-peripheral-stromal-side	-	0	53.93	5.38	498	11719511(Thylakoid lumen proteome); 14729914(thylakoid-pheripheral&lumen); 14729914(thylakoid stripped); 11826309(thylakoid peripheral&lumen); 15322131(Thylakoid-stripped); 16207701(chloroplast stroma); 16287169(Cell Wall proteome); 16923014(cold-stress r	-
AtCG00120	Encodes the ATPase alpha subunit, which is a subunit of ATP synthase and part of the CF1 portion which catalyzes the conversion of ADP to ATP using the proton motive force. This complex is located in the thylakoid membran	Yes	Yes	no	3	12	0	1599	thylakoid membrane (sensu Viridiplantae) & chloroplast ATP synthase complex	-	C	thylakoid-peripheral-stromal-side	-	0	55.32	5.18	507	11719511(Thylakoid lumen proteome); 14729914(thylakoid-pheripheral&lumen); 14729914(thylakoid stripped); 11826309(thylakoid peripheral&lumen); 15322131(Thylakoid-stripped); 16923014(cold-stress responsive chloroplast); 11402211,12068122,15047896,16679420,	10737809(Nucleus -SUBA);
AtCG00470	ATPase epsilon subunit	no	Yes	no	0	4	0	98	thylakoid membrane (sensu Viridiplantae) & hydrogen-translocating F-type ATPase complex	-	C	thylakoid-peripheral-stromal-side	-	0	14.49	5.83	132	14729914(thylakoid-pheripheral&lumen); 14729914(thylakoid stripped); 15322131(Thylakoid-stripped);	-
At4g04640	ATPC1; enzyme regulator	no	Yes	no	0	16	0	588	thylakoid membrane (sensu Viridiplantae) & chloroplast ATP synthase complex & chloroplast	Y	C	thylakoid-peripheral-stromal-side	-	0	40.91	8.13	373	15028209(Total chloroplast); 12938931(Total chloroplast envelope); 14729914(thylakoid-pheripheral&lumen); 14729914(thylakoid stripped); 11826309(thylakoid peripheral&lumen); 15322131(Thylakoid-stripped); 15815986(Silique); 15815986(seedling); 15815986(Lea	-
At5g01920	STN8; kinase/ protein kinase	no	Yes	no	0	1	0	3	thylakoid	Y	C	thylakoid-integral	-	0	54.97	9.42	495	-	-
At2g05620	PGR5 (proton gradient regulation 5); electron carrier	no	Yes	no	0	2	0	36	thylakoid (sensu Viridiplantae)	Y	_	thylakoid-peripheral-stromal-side	-	0	14.29	10.65	133	14729914(thylakoid stripped);	-
AtCG01110	Encodes the 49KDa plastid NAD(P)H dehydrogenase subunit H protein. Its transcription is regulated by an ndhF-specific plastid sigma factor, SIG4.	no	Yes	no	0	1	0	49	thylakoid membrane (sensu Viridiplantae) & chloroplast	-	C	thylakoid	-	0	45.5	5.39	393	15322131(Thylakoid-stripped);	-
At1g20020	FNR2 (FERREDOXIN-NADP(+)-OXIDOREDUCTASE 2); NADPH dehydrogenase/ oxidoreductase/ poly(U) binding	no	Yes	no	0	1	0	498	thylakoid membrane (sensu Viridiplantae) & chloroplast stroma	Y	C	thylakoid-peripheral-stromal-side	-	0	41.16	8.5	369	15028209(Total chloroplast); 14729914(thylakoid stripped); 15322131(Thylakoid-stripped); 16207701(chloroplast stroma); 15815986(Silique); 15815986(seedling); 15815986(Leaf);	-
At3g14420	(S)-2-hydroxy-acid oxidase, peroxisomal, putative / glycolate oxidase, putative / short chain alpha-hydroxy acid oxidase, putative	no	Yes	no	0	1	0	181	-	-	_	peroxisome	-	0	40.34	9.15	367	15028209(Total chloroplast); 14617066(Nuclear proteome); 15821981(crude&pure 80S ribosome); 15815986(Silique); 15815986(seedling); 15815986(Leaf);	-
AtCG00490	large subunit of RUBISCO. Protein is tyrosine-phosphorylated and its phosphorylation state is modulated in response to ABA in Arabidopsis thaliana seeds.	Yes	Yes	yes	11	1	3	7279	thylakoid membrane (sensu Viridiplantae) & chloroplast	-	C	plastid stroma	-	0	52.95	5.87	479	12766230(Total chloroplast envelope); 11826309(thylakoid peripheral&lumen); 15322131(Thylakoid-stripped); 16207701(chloroplast stroma); 16287169(Cell Wall proteome); 15821981(crude&pure 80S ribosome); 16923014(cold-stress responsive chloroplast); 11402211	-
At1g80380	phosphoribulokinase/uridine kinase-related	Yes	no	no	3	0	0	202	-	Y	C	plastid stroma	-	0	51.01	6.71	456	12938931(Total chloroplast envelope); 15815986(Leaf);	-
At2g39730	RCA (RUBISCO ACTIVASE); ADP binding / ATP binding / enzyme regulator/ ribulose-1,5-bisphosphate carboxylase/oxygenase activator	Yes	Yes	yes	18	2	8	3757	thylakoid membrane (sensu Viridiplantae)	Y	C	plastid stroma	-	0	49.1	7.54	446	15028209(Total chloroplast); 12938931(Total chloroplast envelope); 12766230(Total chloroplast envelope); 14617066(Nuclear proteome); 14729914(thylakoid stripped); 15322131(Thylakoid-stripped); 16287169(Cell Wall proteome); 16358359(cell suspension (Gambor	-
At1g67090	RBCS1A (RIBULOSE BISPHOSPHATE CARBOXYLASE SMALL CHAIN 1A); copper ion binding / ribulose-bisphosphate carboxylase	no	Yes	yes	0	1	3	1209	thylakoid membrane (sensu Viridiplantae)	Y	C	plastid stroma	-	0	20.21	7.58	180	15028209(Total chloroplast); 12938931(Total chloroplast envelope); 11719511(Thylakoid lumen proteome); 12766230(Total chloroplast envelope); 11826309(thylakoid peripheral&lumen); 15322131(Thylakoid-stripped); 16207701(chloroplast stroma); 15821981(crude&p	10737809(Peroxisome -SUBA); 14688290(Plastid -SUBA); 16299174(Plastid -SUBA);
At3g12780	PGK1 (PHOSPHOGLYCERATE KINASE 1); phosphoglycerate kinase	Yes	no	no	4	0	0	2675	mitochondrion & cytoplasm	Y	C	plastid stroma	-	0	50.11	5.91	481	15028209(Total chloroplast); 12766230(Total chloroplast envelope); MitoDB(Mitochondrial proteome); 14617066(Nuclear proteome); 16207701(chloroplast stroma); 16287169(Cell Wall proteome); 16358359(cell suspension (Gamborg)); 16358359(cell suspension (M&Sko	15610358(Cytosol -SUBA);
At1g42970	GAPB (GLYCERALDEHYDE-3-PHOSPHATE DEHYDROGENASE B SUBUNIT); glyceraldehyde-3-phosphate dehydrogenase (NADP+)/ glyceraldehyde-3-phosphate dehydrogenase	Yes	Yes	no	7	4	0	2212	thylakoid membrane (sensu Viridiplantae)	Y	C	plastid stroma	-	0	47.66	6.33	447	15028209(Total chloroplast); 12938931(Total chloroplast envelope); 12766230(Total chloroplast envelope); 15322131(Thylakoid-stripped); 16207701(chloroplast stroma); 16358359(cell suspension (M&Skoog)); 16502469(cell suspension-Cd-up); 16923014(cold-stress	-
At3g26650	GAPA (GLYCERALDEHYDE 3-PHOSPHATE DEHYDROGENASE A SUBUNIT); glyceraldehyde-3-phosphate dehydrogenase/ protein binding	Yes	Yes	no	11	6	0	2192	thylakoid membrane (sensu Viridiplantae)	Y	C	plastid stroma	-	0	42.49	7.61	396	15322131(Thylakoid-stripped); 16207701(chloroplast stroma); 16358359(cell suspension (Gamborg)); 16923014(cold-stress responsive chloroplast); 15815986(Silique); 15815986(Leaf); 15052571(soluble leaf); 11402211,12068122,15047896,16679420,17028149(seed-all	-
At1g12900	GAPA-2 (GLYCERALDEHYDE 3-PHOSPHATE DEHYDROGENASE A SUBUNIT 2); NAD or NADH binding / binding / catalytic/ glyceraldehyde-3-phosphate dehydrogenase (phosphorylating)/ glyceraldehyde-3-phosphate dehydrogenase	Yes	no	no	9	0	0	1976	-	Y	C	plastid stroma	-	0	42.84	8.15	399	15028209(Total chloroplast); 12766230(Total chloroplast envelope); 16207701(chloroplast stroma); 16358359(cell suspension (M&Skoog)); 15815986(seedling); 15052571(soluble leaf);	-
At2g21330	fructose-bisphosphate aldolase, putative	Yes	no	yes	1	0	1	827	chloroplast stroma	Y	C	plastid stroma; plastoglobules	-	0	42.93	6.17	399	15028209(Total chloroplast); 12938931(Total chloroplast envelope); 11719511(Thylakoid lumen proteome); 16207701(chloroplast stroma); 16414959(plastoglubular); 16461379(plastoglubular); 15821981(crude&pure 80S ribosome); 16358359(cell suspension (M&Skoog))	-
At3g54050	fructose-1,6-bisphosphatase, putative / D-fructose-1,6-bisphosphate 1-phosphohydrolase, putative / FBPase, putative	Yes	no	no	1	0	0	449	-	Y	C	plastid stroma	-	0	45.16	5.24	417	15028209(Total chloroplast); 16207701(chloroplast stroma); 16923014(cold-stress responsive chloroplast); 15815986(seedling); 15815986(Leaf);	-
At1g24360	3-oxoacyl-(acyl-carrier protein) reductase, chloroplast / 3-ketoacyl-acyl carrier protein reductase	no	Yes	no	0	2	0	66	-	Y	C	plastid stroma	-	0	33.54	9.45	319	12938931(Total chloroplast envelope);	-
At3g05970	LACS6 (long-chain acyl-CoA synthetase 6); long-chain-fatty-acid-CoA ligase	no	Yes	no	0	4	0	-	-	Y	C	-	-	0	76.6	8.11	701	17432890(leaf total membranes); 18931141(peroxisomes- high&low purity (cell culture)); 18931141(peroxisomes-high purity (cell culture)); 19200160(flower-stage 12); 19546170(mature pollen grains); 19260003(detergent resistant plasma membrane (DRM) proteins	12366803(peroxisome -SUBA);
At4g31780	Lipid synthesis : Monogalactosyldiacylglycerol synthase	no	no	yes	0	0	6	22	chloroplast inner membrane	Y	C	envelope-inner	-	0	55.43	9.03	504	12938931(Total chloroplast envelope); 12766230(Total chloroplast envelope);	11553816(Plastid -SUBA);
At2g15620	NIR1 (NITRITE REDUCTASE 1); ferredoxin-nitrate reductase/ nitrite reductase (NO-forming)	Yes	no	yes	2	0	2	505	mitochondrion	Y	C	plastid stroma	-	0	65.5	5.95	586	15028209(Total chloroplast); MitoDB(Mitochondrial proteome); 16207701(chloroplast stroma); 16358359(cell suspension (M&Skoog)); 15815986(seedling); 15815986(Leaf); 15052571(soluble leaf);	-
At5g35630	GS2 (GLUTAMINE SYNTHETASE 2); glutamate-ammonia ligase	Yes	no	no	2	0	0	786	thylakoid membrane (sensu Viridiplantae) & mitochondrion & chloroplast	Y	C	plastid stroma	-	0	47.41	6.42	430	15028209(Total chloroplast); 12938931(Total chloroplast envelope); 15322131(Thylakoid-stripped); 16207701(chloroplast stroma); 15821981(crude&pure 80S ribosome); 15815986(Silique); 15815986(seedling); 15815986(Leaf); 15052571(soluble leaf);	15273293(Mitochondrion -SUBA); 15273293(Plastid -SUBA);
At1g65960	GAD2 (GLUTAMATE DECARBOXYLASE 2); calmodulin binding / glutamate decarboxylase	Yes	Yes	no	7	3	0	-	-	-	M	-	-	0	41.75	6.07	494	19525416(leaf (wt and clpr4-1 mutant)); 17216043(leaf); 19334764(plasma membrane (cell culture)); 19888209(leaves); 19423572(leaf (wt and clpr2-1));	-
At1g29900	CARB (CARBAMOYL PHOSPHATE SYNTHETASE B); ATP binding / carbamoyl-phosphate synthase/ catalytic	no	Yes	no	0	2	0	101	-	Y	C	plastid stroma	-	0	129.95	5.53	1187	15028209(Total chloroplast); 16207701(chloroplast stroma); 16358359(cell suspension (Gamborg)); 15052571(soluble leaf);	-
At2g37500	arginine biosynthesis protein ArgJ family	Yes	Yes	no	1	5	0	23	-	Y	C	plastid stroma	-	0	48.71	6.21	468	-	-
At1g72810	threonine synthase, putative	Yes	no	no	1	0	0	8	-	Y	C	-	-	0	56.92	8.23	516	-	-
At1g31230	AK-HSDH I (ASPARTATE KINASE-HOMOSERINE DEHYDROGENASE I); aspartate kinase/ homoserine dehydrogenase	Yes	no	no	1	0	0	119	-	Y	C	plastid stroma	-	0	99.4	6.33	911	-	-
At1g14810	semialdehyde dehydrogenase family protein	Yes	no	no	1	0	0	102	mitochondrion	Y	C	plastid stroma	-	0	40.74	6.52	375	MitoDB(Mitochondrial proteome); 15815986(seedling);	-
At1g22410	Amino acid biosynthesis : Phospho-2-dehydro-3-deoxyheptonate aldolase 2	no	no	yes	0	0	3	10	chloroplast	Y	C	-	-	0	56.15	8.93	507	15815986(seedling); 15815986(Leaf);	-
At1g09795	ATATP-PRT2 (ATP PHOSPHORIBOSYL TRANSFERASE 2); ATP phosphoribosyltransferase	Yes	no	no	1	0	0	34	-	Y	C	plastid stroma	-	0	44.75	6.34	413	-	-
At1g74470	geranylgeranyl reductase	no	Yes	no	0	2	0	151	thylakoid membrane (sensu Viridiplantae)	Y	C	thylakoid	-	0	51.83	9.03	467	15028209(Total chloroplast); 12938931(Total chloroplast envelope); 15322131(Thylakoid-stripped);	-
At5g67030	ABA1 (ABA DEFICIENT 1); zeaxanthin epoxidase	no	Yes	no	0	3	0	48	-	Y	C	thylakoid	-	0	73.84	6.6	667	12938931(Total chloroplast envelope);	-
At5g17230	phytoene synthase (PSY) / geranylgeranyl-diphosphate geranylgeranyl transferase	no	Yes	no	0	3	0	-	-	Y	C	-	-	0	47.49	9.22	437	18431481(chloroplast); 19525416(leaf (wt and clpr4-1 mutant));	-
At2g22475	GEM (GL2-EXPRESSION MODULATOR)	no	Yes	no	0	3	0	-	-	-	-	-	-	0	32.22	5.27	299	-	-
At3g45140	LOX2 (LIPOXYGENASE 2); lipoxygenase	Yes	no	no	5	0	0	872	thylakoid membrane (sensu Viridiplantae) & chloroplast	Y	C	plastid stroma	-	0	102.04	5.42	896	15028209(Total chloroplast); 12938931(Total chloroplast envelope); 14729914(thylakoid stripped); 15322131(Thylakoid-stripped); 16207701(chloroplast stroma); 15815986(Silique);	-
At5g42650	AOS (ALLENE OXIDE SYNTHASE); allene oxide synthase/ hydro-lyase/ oxygen binding	no	Yes	no	0	1	0	159	thylakoid membrane (sensu Viridiplantae) & mitochondrion	Y	C	plastoglobules; thylakoid-peripheral-stromal-side	-	0	58.19	8.75	518	15028209(Total chloroplast); 12938931(Total chloroplast envelope); 12766230(Total chloroplast envelope); MitoDB(Mitochondrial proteome); 15322131(Thylakoid-stripped); 16461379(plastoglubular);	-
At1g21640	NADK2; NAD+ kinase/ calmodulin binding	Yes	Yes	no	4	3	0	-	-	Y	C	plastid	-	0	109.19	7.5	999	18431481(chloroplast); 20423899(chloroplast);	16244906(plastid -SUBA);
At3g25660	glutamyl-tRNA(Gln) amidotransferase, putative	Yes	no	no	1	0	0	22	-	Y	C	-	-	0	57.18	6.16	537	16207701(chloroplast stroma);	-
At1g08520	CHLD; ATP binding / magnesium chelatase/ nucleoside-triphosphatase/ nucleotide binding	Yes	no	no	2	0	0	15	magnesium chelatase complex	Y	C	plastid	-	0	83.28	5.26	760	-	-
At4g25080	CHLM (magnesium-protoporphyrin IX methyltransferase); magnesium protoporphyrin IX methyltransferase	no	Yes	no	0	3	0	44	thylakoid membrane (sensu Viridiplantae) & chloroplast envelope	Y	C	plastid	-	0	33.79	7.68	312	15028209(Total chloroplast); 12938931(Total chloroplast envelope); 15815986(Silique); 15815986(seedling); 15815986(Leaf);	-
At3g56940	CRD1 (COPPER RESPONSE DEFECT 1); DNA binding / magnesium-protoporphyrin IX monomethyl ester (oxidative) cyclase	no	Yes	no	0	5	0	94	thylakoid membrane (sensu Viridiplantae) & chloroplast inner membrane	Y	C	envelope-inner-peripheral-stromal-side; thylakoid-peripheral-stromal-side	-	0	47.63	8.55	409	15028209(Total chloroplast); 12938931(Total chloroplast envelope); 15322131(Thylakoid-stripped);	-
At4g27440	PORB (PROTOCHLOROPHYLLIDE OXIDOREDUCTASE B); oxidoreductase/ protochlorophyllide reductase	Yes	Yes	yes	2	1	1	546	thylakoid membrane (sensu Viridiplantae)	Y	C	thylakoid-peripheral-stromal-side	-	0	43.36	9.22	401	15028209(Total chloroplast); 12938931(Total chloroplast envelope); 12766230(Total chloroplast envelope); 15322131(Thylakoid-stripped); 15815986(seedling); 15815986(Leaf);	14688290(Plastid -SUBA);
At1g03630	POR C (PROTOCHLOROPHYLLIDE OXIDOREDUCTASE); NADPH dehydrogenase/ oxidoreductase/ protochlorophyllide reductase	no	Yes	no	0	1	0	287	thylakoid membrane (sensu Viridiplantae)	Y	C	thylakoid-peripheral-stromal-side	-	0	43.88	9.18	401	15028209(Total chloroplast); 12938931(Total chloroplast envelope); 15322131(Thylakoid-stripped);	-
At5g08280	HEMC (HYDROXYMETHYLBILANE SYNTHASE); hydroxymethylbilane synthase	Yes	no	no	1	0	0	312	chloroplast	Y	C	plastid stroma	-	0	41.04	8.75	382	12938931(Total chloroplast envelope); 16207701(chloroplast stroma); 15815986(seedling); 15815986(Leaf);	-
At4g29130	Glycolysis:hexokinase 1	no	no	yes	0	0	10	4	mitochondrion	-	S	-	-	1	53.7	5.75	496	MitoDB(Mitochondrial proteome); 15539469(vacuole); 16618929(MITO/PLASTID-LOPIT-callus);	-
At2g32290	BAM6 (BETA-AMYLASE 6); beta-amylase/ catalytic/ cation binding	no	Yes	no	0	7	0	6	-	-	_	-	-	0	66.56	6.32	577	-	-
At4g18810	binding / catalytic/ transcription repressor	no	Yes	no	0	10	0	38	-	Y	C	plastid stroma	-	0	65.46	8.16	596	14760709(Vacuolar proteome); 15815986(Leaf);	-
At4g09010	APX4 (ASCORBATE PEROXIDASE 4); heme binding / peroxidase	no	Yes	no	0	4	0	85	thylakoid membrane (sensu Viridiplantae) & thylakoid lumen (sensu Viridiplantae) & nucleus & cytoplasm	Y	C	thylakoid-peripheral-lumenal-side	-	0	37.93	8.58	349	15028209(Total chloroplast); 11719511(Thylakoid lumen proteome); 14729914(thylakoid stripped); 11826309(thylakoid peripheral&lumen); 15322131(Thylakoid-stripped); 15815986(seedling); 15815986(Leaf);	15610358(Unclear -SUBA);
At5g63420	emb2746 (embryo defective 2746); DNA binding / catalytic/ hydrolase	Yes	Yes	no	8	6	0	8	-	Y	C	plastid stroma	-	0	100.55	8.42	911	15028209(Total chloroplast);	-
At5g63400	ADK1 (ADENYLATE KINASE 1); ATP binding / adenylate kinase/ nucleobase, nucleoside, nucleotide kinase/ nucleotide kinase/ phosphotransferase, phosphate group as acceptor	no	Yes	no	0	6	0	-	mitochondrion	-	-	-	-	0	26.93	6.91	246	MitoDB(Mitochondrial proteome); 15276431(Mitochondrial proteome); 16358359(cell suspension (Gamborg)); 16358359(cell suspension (M&Skoog)); 16502469(cell suspension-Cd-up); 16247729(mature Pollen); 15815986(Leaf); 16618929(MITO/PLASTID-LOPIT-callus); 1527	-
At5g35170	adenylate kinase family protein	no	Yes	no	0	4	0	24	thylakoid membrane (sensu Viridiplantae)	Y	C	plastid	-	0	65.73	8.84	588	12938931(Total chloroplast envelope); 15322131(Thylakoid-stripped);	-
At1g31800	CYP97A3 (CYTOCHROME P450-TYPE MONOOXYGENASE 97A3); carotene beta-ring hydroxylase/ oxygen binding	no	Yes	no	0	6	0	37	-	Y	C	plastid	-	0	66.84	5.81	595	-	-
At2g39920	acid phosphatase class B family protein	no	Yes	no	0	1	0	-	-	-	-	-	1	1	32.67	5.71	283	16358359(cell suspension (Gamborg)); 16502469(cell suspension-Cd-up);	-
At4g12880	plastocyanin-like domain-containing protein	no	Yes	no	0	1	0	-	-	-	S	-	-	1	16.13	9.25	141	18538804(apoplast); 18796151(cell wall (hypocotyl));	-
At4g23430	TIC/TOC complex : TiC32-like protein	no	no	yes	0	0	1	12	chloroplast inner membrane	-	_	-	-	0	34.49	8.95	320	12766230(Total chloroplast envelope);	-
At4g20760	short-chain dehydrogenase/reductase (SDR) family protein	no	Yes	no	0	1	0	-	-	Y	M	-	-	0	32.48	9.64	298	19525416(leaf (wt and clpr4-1 mutant)); 19114538(guard cells Arabidopsis leaf);	-
At5g04900	short-chain dehydrogenase/reductase (SDR) family protein	no	Yes	yes	0	1	3	4	-	Y	C	-	-	0	38.14	9.49	348	-	-
At4g01050	hydroxyproline-rich glycoprotein family protein	no	Yes	no	0	1	0	81	thylakoid membrane (sensu Viridiplantae)	Y	C	thylakoid	2	0	49.38	5.21	466	15028209(Total chloroplast); 12938931(Total chloroplast envelope); 14729914(thylakoid stripped); 15322131(Thylakoid-stripped);	-
At1g26220	GCN5-related N-acetyltransferase (GNAT) family protein	no	Yes	no	0	2	0	-	-	Y	C	plastid	-	0	21.85	9.39	197	18431481(chloroplast); 19525416(leaf (wt and clpr4-1 mutant));	-
At3g23400	plastid-lipid associated protein PAP / fibrillin family protein	no	Yes	no	0	4	0	118	thylakoid membrane (sensu Viridiplantae)	Y	C	plastoglobules; thylakoid-peripheral-stromal-side	-	0	30.45	5.82	284	15028209(Total chloroplast); 11719511(Thylakoid lumen proteome); 14617066(Nuclear proteome); 14729914(thylakoid-pheripheral&lumen); 14729914(thylakoid stripped); 11826309(thylakoid peripheral&lumen); 15322131(Thylakoid-stripped); 16414959(plastoglubular);	-
At3g26070	plastid-lipid associated protein PAP / fibrillin family protein	no	Yes	no	0	4	0	28	thylakoid membrane (sensu Viridiplantae)	Y	C	thylakoid-peripheral-stromal-side	-	0	27.16	9.7	242	15028209(Total chloroplast); 14729914(thylakoid stripped); 15322131(Thylakoid-stripped); 16414959(plastoglubular);	-
At2g35490	plastid-lipid associated protein PAP, putative	no	Yes	no	0	1	0	60	thylakoid membrane (sensu Viridiplantae)	Y	C	plastoglobules; thylakoid-peripheral-stromal-side	-	0	40.5	4.45	376	15028209(Total chloroplast); 14729914(thylakoid-pheripheral&lumen); 14729914(thylakoid stripped); 11826309(thylakoid peripheral&lumen); 15322131(Thylakoid-stripped); 16414959(plastoglubular); 16461379(plastoglubular);	-
At4g00030	plastid-lipid associated protein PAP / fibrillin family protein	no	Yes	no	0	3	0	-	-	Y	C	plastoglobules	-	0	24.07	9.35	212	19525416(leaf (wt and clpr4-1 mutant));	-
At3g17970	TIC/TOC complex : TOC64-like protein	no	no	yes	0	0	2	55	-	-	S	-	-	1	64.02	8.61	589	-	12954611(Mitochondrion -SUBA); 14741350(Plastid -SUBA);
At1g02150	pentatricopeptide (PPR) repeat-containing protein	Yes	no	yes	9	0	1	6	-	Y	M	-	-	0	59.88	8.23	524	-	-
At1g12250	thylakoid lumenal protein-related	no	Yes	no	0	2	0	23	thylakoid membrane (sensu Viridiplantae)	Y	C	thylakoid-peripheral-lumenal-side	-	0	30.06	8.72	280	15028209(Total chloroplast); 14729914(thylakoid-pheripheral&lumen); 14729914(thylakoid stripped); 15322131(Thylakoid-stripped);	-
At4g13010	ceQORH: oxidoreductase, zinc-binding dehydrogenase family protein	no	Yes	yes	0	8	6	16	thylakoid membrane (sensu Viridiplantae)	-	_	envelope-inner-peripheral-stromal-side	-	0	34.43	9.04	329	15322131(Thylakoid-stripped); 15539469(vacuole);	12368288(Plastid -SUBA);
At2g29720	CTF2B; monooxygenase/ oxidoreductase	no	Yes	no	0	1	0	2	-	-	M	-	-	0	46.88	9.52	427	-	-
At1g01860	PFC1 (PALEFACE 1); mRNA (2'-O-methyladenosine-N6-)-methyltransferase	Yes	no	no	1	0	0	-	-	Y	C	-	-	0	38.02	8.77	343		-
At3g23070	RNA binding	Yes	no	no	1	0	0	-	-	Y	C	mitochondria; plastid stroma	-	0	100.17	5.94	881	18431481(chloroplast);	-
At1g06190	ATP binding / ATPase, coupled to transmembrane movement of ions, phosphorylative mechanism	Yes	Yes	no	3	7	0	-	-	Y	C	-	-	0	44.53	5.06	401	18431481(chloroplast); 19376835(leaf phosphoproteins); 19114538(guard cells Arabidopsis leaf);	-
At1g76890	GT2; transcription factor	no	Yes	no	0	1	0	-	-	-	-	-	-	0	65.84	6.35	575	-	-
At1g33240	AT-GTL1 (GT2-LIKE 1); DNA binding / transcription factor	no	Yes	no	0	4	0	-	-	-	-	-	-	0	74.21	5.73	669	18436743(specific to leaves); 19376835(leaf phosphoproteins);	-
At3g07670	SET domain-containing protein	no	Yes	no	0	3	0	-	-	Y	M	-	-	0	57.61	8.25	504	-	-
At5g16840	BPA1 (BINDINGPARTNEROFACD11 1); nucleic acid binding / nucleotide binding / oxidoreductase	Yes	Yes	no	2	4	0	-	-	-	_	-	-	0	27.23	5.46	260	19525416(leaf (wt and clpr4-1 mutant)); 19714877(interactomes 14-3-3 complexes (cell culture)); 19114538(guard cells Arabidopsis leaf);	-
At1g01080	33 kDa ribonucleoprotein, chloroplast, putative / RNA-binding protein cp33, putative	Yes	no	no	3	0	0	26	-	Y	C	plastid stroma	-	0	32.57	9	293	15028209(Total chloroplast); 12938931(Total chloroplast envelope); 14617066(Nuclear proteome);	-
At5g26742	emb1138 (embryo defective 1138); ATP binding / ATP-dependent helicase/ RNA binding / helicase/ nucleic acid binding / zinc ion binding	Yes	no	no	2	0	0	38	-	Y	C	plastid stroma	-	0	81	7.24	747	16207701(chloroplast stroma);	-
At1g59990	DEAD/DEAH box helicase, putative (RH22)	Yes	no	no	6	0	0	-	-	Y	C	-	-	0	64.75	5.8	581	18431481(chloroplast); 19525416(leaf (wt and clpr4-1 mutant));	-
At3g06980	DEAD/DEAH box helicase, putative	Yes	no	no	2	0	0	-	-	Y	C	-	-	0	87.43	7.56	781	18431481(chloroplast); 19525416(leaf (wt and clpr4-1 mutant)); 20423899(chloroplast); 19114538(guard cells Arabidopsis leaf);	-
At3g46780	PTAC16 (PLASTID TRANSCRIPTIONALLY ACTIVE 16); binding / catalytic	no	Yes	no	0	5	0	320	thylakoid membrane (sensu Viridiplantae) & plastid chromosome	Y	C	thylakoid	-	0	54.35	8.9	510	15028209(Total chloroplast); 12938931(Total chloroplast envelope); 15322131(Thylakoid-stripped); 16326926(nucleoids); 15815986(seedling); 15815986(Leaf);	-
At1g80480	PTAC17 (PLASTID TRANSCRIPTIONALLY ACTIVE17)	Yes	no	no	1	0	0	43	plastid chromosome	Y	C	plastid stroma	-	0	49.48	5.67	444	16326926(nucleoids);	-
At5g35970	DNA-binding protein, putative	Yes	no	no	2	0	0	60	-	Y	C	plastid stroma	-	0	105.04	7.95	961	15028209(Total chloroplast); 12938931(Total chloroplast envelope);	-
At5g30510	RPS1 (RIBOSOMAL PROTEIN S1); RNA binding / structural constituent of ribosome	Yes	Yes	no	5	1	0	683	-	Y	C	plastid ribosome	-	0	45.11	5.12	416	15028209(Total chloroplast); 15815986(seedling); 15815986(Leaf);	-
At3g63490	ribosomal protein L1 family protein	Yes	Yes	yes	1	2	6	228	thylakoid membrane (sensu Viridiplantae)	Y	C	plastid ribosome	-	0	37.63	9.29	346	15028209(Total chloroplast); 14617066(Nuclear proteome); 15322131(Thylakoid-stripped); 16207701(chloroplast stroma); 15815986(Silique); 15815986(seedling); 15815986(Leaf);	-
AtCg00160	Chloroplast ribosomal protein S2	Yes	Yes	no	6	1	0	92	plastid small ribosomal subunit & chloroplast	-	C	plastid ribosome	-	0	26.9	9.7	236	15028209(Total chloroplast);	-
At3g25920	RPL15; structural constituent of ribosome	no	Yes	no	0	2	0	158	plastid large ribosomal subunit	Y	C	plastid ribosome	-	0	29.7	10.77	277	15028209(Total chloroplast); 16207701(chloroplast stroma);	-
AtCg00830	encodes a chloroplast ribosomal protein L2, a constituent of the large subunit of the ribosomal complex	Yes	Yes	no	1	2	0	150	plastid large ribosomal subunit	-	C	plastid ribosome	-	0	29.86	10.84	274	-	-
At3g44890	RPL9 (RIBOSOMAL PROTEIN L9); structural constituent of ribosome	Yes	Yes	yes	2	2	2	129	plastid large ribosomal subunit	Y	C	plastid ribosome	-	0	22.13	9.68	197	15028209(Total chloroplast); 16207701(chloroplast stroma);	-
AtCg00800	encodes a chloroplast ribosomal protein S3, a constituent of the small subunit of the ribosomal complex	Yes	Yes	yes	8	4	6	454	plastid small ribosomal subunit & chloroplast	-	C	plastid ribosome	-	0	25.18	9.51	218	16326926(nucleoids);	-
AtCg00750	30S chloroplast ribosomal protein S11	Yes	Yes	no	2	2	0	113	plastid small ribosomal subunit	Y	C	plastid ribosome	-	0	15.02	12.24	138	-	-
AtCg00780	encodes a chloroplast ribosomal protein L14, a constituent of the large subunit of the ribosomal complex	Yes	Yes	yes	2	2	1	75	plastid large ribosomal subunit	-	C	plastid ribosome	-	0	13.58	9.38	122	-	-
AtCg00790	chloroplast gene encoding a ribosomal protein L16, which is a constituent of 50S large ribosomal subunit	Yes	Yes	no	1	1	0	34	plastid large ribosomal subunit	-	C	plastid ribosome	-	0	15.29	11.62	135	-	-
At1g48350	ribosomal protein L18 family protein	Yes	Yes	no	1	2	0	64	-	Y	C	plastid ribosome	-	0	18.72	9.92	170	12938931(Total chloroplast envelope);	-
At5g65220	ribosomal protein L29 family protein	no	Yes	no	0	2	0	59	-	Y	C	plastid ribosome	-	0	19.37	10.5	173	15028209(Total chloroplast); 12938931(Total chloroplast envelope); 16326926(nucleoids);	-
AtCg01120	encodes a chloroplast ribosomal protein S15, a constituent of the small subunit of the ribosomal complex	Yes	Yes	no	5	2	0	53	plastid small ribosomal subunit	-	C	plastid ribosome	-	0	10.71	10.81	88	16207701(chloroplast stroma);	-
At5g54600	50S ribosomal protein L24, chloroplast (CL24)	Yes	Yes	no	2	2	0	73	-	Y	C	plastid ribosome	-	0	21.97	9.69	198	-	-
At3g13120	30S ribosomal protein S10, chloroplast, putative	Yes	Yes	no	1	1	0	21	-	Y	C	plastid ribosome	-	0	20.83	8.99	191	-	-
At3g27830	RPL12-A (RIBOSOMAL PROTEIN L12-A); structural constituent of ribosome	Yes	Yes	no	2	3	0	165	thylakoid membrane (sensu Viridiplantae)	Y	C	plastid ribosome	-	0	20.07	5.5	191	15028209(Total chloroplast); 14729914(thylakoid-pheripheral&lumen); 14729914(thylakoid stripped); 15322131(Thylakoid-stripped); 16326926(nucleoids);	-
At2g33800	ribosomal protein S5 family protein	Yes	Yes	yes	10	7	2	414	-	Y	C	plastid stroma	-	0	32.64	8.99	303	15028209(Total chloroplast); 14617066(Nuclear proteome); 14729914(thylakoid stripped); 11826309(thylakoid peripheral&lumen); 16207701(chloroplast stroma); 16358359(cell suspension (M&Skoog)); 16502469(cell suspension-CD-down); 15815986(Silique); 15815986(	-
At5g13510	ribosomal protein L10 family protein	Yes	Yes	no	1	3	0	131	cytosolic ribosome (sensu Eukaryota)	Y	C	plastid ribosome	-	0	24.73	9.36	220	16207701(chloroplast stroma); 15821981(crude&pure 80S ribosome); 15815986(Silique); 15815986(seedling); 15815986(Leaf);	-
At5g14320	30S ribosomal protein S13, chloroplast (CS13)	no	Yes	no	0	4	0	93	-	Y	C	plastid ribosome	-	0	19.09	10.26	169	15028209(Total chloroplast); 12938931(Total chloroplast envelope);	11919680(Plastid -SUBA);
At1g05190	emb2394 (embryo defective 2394); structural constituent of ribosome	Yes	Yes	yes	8	6	2	171	-	Y	C	plastid ribosome	-	0	24.7	9.89	223	15028209(Total chloroplast); 12938931(Total chloroplast envelope); 16207701(chloroplast stroma); 15815986(Silique); 15815986(Leaf);	-
AtCg00820	Encodes a 6.8-kDa protein of the small ribosomal subunit.	Yes	Yes	no	1	1	0	23	plastid small ribosomal subunit & plastid ribosome	-	C	plastid ribosome	-	0	10.57	10.77	92	16207701(chloroplast stroma);	-
At1g07320	RPL4; poly(U) binding / structural constituent of ribosome	Yes	no	no	1	0	0	128	thylakoid membrane (sensu Viridiplantae) & plastid large ribosomal subunit	Y	C	plastid ribosome	-	0	30.55	8.92	282	15028209(Total chloroplast); 14617066(Nuclear proteome); 11826309(thylakoid peripheral&lumen); 15322131(Thylakoid-stripped); 16207701(chloroplast stroma); 15821981(crude&pure 80S ribosome);	-
At1g79850	RPS17 (RIBOSOMAL PROTEIN S17); structural constituent of ribosome	Yes	no	no	1	0	0	86	-	Y	C	plastid ribosome	-	0	16.28	10.57	149	15028209(Total chloroplast); 12938931(Total chloroplast envelope); 16207701(chloroplast stroma);	-
At2g43030	ribosomal protein L3 family protein	Yes	no	no	1	0	0	211	-	Y	C	plastid ribosome	-	0	29.36	10.43	271	15028209(Total chloroplast); 16207701(chloroplast stroma);	-
At4g01310	ribosomal protein L5 family protein	Yes	no	no	2	0	0	352	cytosolic ribosome (sensu Eukaryota)	Y	C	plastid ribosome	-	0	28.34	10	262	15028209(Total chloroplast); 12938931(Total chloroplast envelope); 16207701(chloroplast stroma); 15821981(crude&pure 80S ribosome); 15815986(Silique); 15815986(Leaf);	-
AtCg00770	chloroplast 30S ribosomal protein S8	Yes	no	no	3	0	0	115	plastid small ribosomal subunit	-	C	plastid ribosome	-	0	15.48	10.93	134	-	-
At5g47190	ribosomal protein L19 family protein	Yes	no	no	2	0	0	58	-	Y	C	plastid ribosome	-	0	25.46	10.06	229	12938931(Total chloroplast envelope);	-
At3g15190	chloroplast 30S ribosomal protein S20, putative	Yes	no	no	2	0	0	43	-	Y	C	plastid ribosome	-	0	21.82	10.14	202	15028209(Total chloroplast); 16207701(chloroplast stroma);	-
At4g17560	ribosomal protein L19 family protein	Yes	no	no	3	0	0	35	-	Y	C	plastid stroma	-	0	25.51	10.03	225	12938931(Total chloroplast envelope);	-
AtCg00650	chloroplast-encoded ribosomal protein S18	Yes	no	no	3	0	0	40	plastid small ribosomal subunit & chloroplast	-	C	plastid ribosome	-	0	12.06	12.16	101	12766230(Total chloroplast envelope); 16207701(chloroplast stroma);	-
AtCg00900	encodes a chloroplast ribosomal protein S7, a constituent of the small subunit of the ribosomal complex	Yes	Yes	no	1	4	0	-	plastid small ribosomal subunit	-	_	plastid ribosome	-	0	17.36	11.28	155	18431481(chloroplast); 19525416(leaf (wt and clpr4-1 mutant)); 20423899(chloroplast); 19888209(80S polysomal fraction); 19888209(leaves); 19376835(leaf phosphoproteins);	-
AtCg01020	encodes a chloroplast ribosomal protein L32, a constituent of the large subunit of the ribosomal complex	no	Yes	no	0	1	0	-	plastid large ribosomal subunit	-	M	plastid ribosome	-	0	6.06	12.05	52	19888209(80S polysomal fraction); 20061580(chloroplast envelope (inner+outer));	-
At5g16130	40S ribosomal protein S7 (RPS7C)	no	Yes	no	0	1	0	-	cytosolic ribosome (sensu Eukaryota)	-	-	cytosol	-	0	22.06	9.75	190	15496452(nucleolus); 15821981(crude&pure 80S ribosome); 15734919(80S cytolic ribosomes); 17317660(Plasma Membrane proteome); 18538804(total leaf); 17934214(cytosolic ribosome); 17432890(leaf total membranes); 18814325(cotyledons); 19200160(flower-stage 12	-
At2g20450	60S ribosomal protein L14 (RPL14A)	no	Yes	no	0	2	0	-	-	-	-	cytosol	-	0	15.51	10.12	134	15215502(Vacuolar proteome); 16247729(mature Pollen); 16618929(ER-LOPIT-callus); 17934214(cytosolic ribosome); 18931141(peroxisomes- high&low purity (cell culture)); 19546170(mature pollen grains); 19525416(leaf (wt and clpr4-1 mutant)); 19334764(plasma m	-
At3g56910	PSRP5 (PLASTID-SPECIFIC 50S RIBOSOMAL PROTEIN 5)	Yes	no	no	1	0	0	3	-	Y	C	plastid stroma	-	0	16.36	10.85	148	15028209(Total chloroplast); 12938931(Total chloroplast envelope); 14729914(thylakoid-pheripheral&lumen); 14729914(thylakoid stripped);	-
At5g24490	Ribosomal protein	no	no	yes	0	0	6	37	-	Y	C	plastid stroma	-	0	34.85	6.29	308	15028209(Total chloroplast);	-
At4g29060	emb2726 (embryo defective 2726); RNA binding / translation elongation factor	Yes	no	no	1	0	0	719	-	Y	C	plastid stroma	-	0	103.78	4.95	953	15028209(Total chloroplast); 12938931(Total chloroplast envelope); 16358359(cell suspension (M&Skoog)); 16502469(cell suspension-Cd-up);	-
At4g34620	SSR16 (SMALL SUBUNIT RIBOSOMAL PROTEIN 16); structural constituent of ribosome	Yes	Yes	no	4	3	0	66	ribosome	-	M	-	-	0	12.69	9.8	113	12938931(Total chloroplast envelope);	-
At1g17220	FUG1 (fu-gaeri1); translation initiation factor	Yes	no	no	10	0	0	22	-	Y	C	plastid stroma	-	0	109.74	7.14	1026	12938931(Total chloroplast envelope);	-
At1g07920	elongation factor 1-alpha / EF-1-alpha	Yes	no	no	2	0	0	68	mitochondrion	-	_	mitochondria	-	0	49.5	9.19	449	15028209(Total chloroplast); MitoDB(Mitochondrial proteome); 15496452(nucleolus); 16242667(mature Pollen); 16358359(cell suspension (Gamborg)); 16502469(cell suspension-Cd-up); 16247729(mature Pollen); 15815986(seedling); 15815986(Leaf);	-
At4g20360	ATRABE1B (ARABIDOPSIS RAB GTPASE HOMOLOG E1B); GTP binding / GTPase/ translation elongation factor	Yes	Yes	no	13	10	0	1376	thylakoid membrane (sensu Viridiplantae)	Y	C	plastid stroma	-	0	51.63	5.83	476	15028209(Total chloroplast); 12938931(Total chloroplast envelope); 12766230(Total chloroplast envelope); 14617066(Nuclear proteome); 15322131(Thylakoid-stripped); 16207701(chloroplast stroma); 16326926(nucleoids); 15496452(nucleolus); 16358359(cell suspen	-
At5g36170	HCF109 (HIGH CHLOROPHYLL FLUORESCENT 109); translation release factor/ translation release factor, codon specific	no	Yes	no	0	4	0	10	chloroplast	Y	C	plastid	-	0	50.97	5.35	456	-	-
At1g16720	HCF173 (high chlorophyll fluorescence phenotype 173); binding / catalytic/ transcription repressor	Yes	no	no	6	0	0	44	-	Y	C	plastid	-	0	65.7	9.14	598	12938931(Total chloroplast envelope);	-
At4g01800	preprotein translocase secA subunit, putative	Yes	Yes	no	4	11	0	105	-	Y	C	plastid stroma; thylakoid-peripheral-stromal-side	-	0	115.18	6.07	1022	15028209(Total chloroplast); 12938931(Total chloroplast envelope);	-
At1g65260	PTAC4 (PLASTID TRANSCRIPTIONALLY ACTIVE4)	Yes	no	no	2	0	0	138	thylakoid membrane (sensu Viridiplantae) & plastid chromosome & chloroplast envelope & thylakoid (sensu Viridiplantae)	Y	C	envelope; plastid stroma; thylakoid-peripheral-stromal-side	-	0	36.39	9.17	330	12938931(Total chloroplast envelope); 12766230(Total chloroplast envelope); 15322131(Thylakoid-stripped); 16207701(chloroplast stroma); 16326926(nucleoids);	-
At2g20890	PSB29	no	Yes	no	0	5	0	106	thylakoid membrane (sensu Viridiplantae) & plastid stroma & chloroplast & plastid outer membrane & plastid inner membrane	Y	C	envelope; plastid stroma; thylakoid-peripheral-stromal-side	-	0	33.79	9.2	300	15028209(Total chloroplast); 12938931(Total chloroplast envelope); 15322131(Thylakoid-stripped); 16207701(chloroplast stroma); 15815986(seedling); 15815986(Leaf);	15516501(Plastid -SUBA);
At1g06950	TIC110 (TRANSLOCON AT THE INNER ENVELOPE MEMBRANE OF CHLOROPLASTS 110)	no	Yes	no	0	14	0	982	chloroplast	Y	C	envelope-inner-integral	2	0	112.12	5.72	1016	15028209(Total chloroplast); 12938931(Total chloroplast envelope); 12766230(Total chloroplast envelope);	-
At3g07070	protein kinase family protein	no	Yes	no	0	1	0	-	-	-	-	-	-	0	46.07	5.35	414	-	-
At1g65130	ubiquitin carboxyl-terminal hydrolase-related	no	Yes	no	0	1	0	5	-	-	_	-	-	0	124.65	5.6	1086	-	-
At5g51070	ERD1 (EARLY RESPONSIVE TO DEHYDRATION 1); ATP binding / ATPase/ nucleoside-triphosphatase/ nucleotide binding / protein binding	Yes	no	no	4	0	0	187	chloroplast & chloroplast stroma	Y	C	plastid stroma	-	0	103.23	5.89	945	12938931(Total chloroplast envelope);	9375397(Plastid -SUBA);
At1g12410	CLP2 (CLP PROTEASE PROTEOLYTIC SUBUNIT 2); serine-type endopeptidase	Yes	Yes	yes	2	2	3	100	chloroplastic endopeptidase Clp complex & chloroplast stroma & thylakoid (sensu Viridiplantae)	Y	C	plastid stroma; thylakoid-peripheral-stromal-side	-	0	31.2	9.19	279	12938931(Total chloroplast envelope); 12766230(Total chloroplast envelope); 16207701(chloroplast stroma);	-
At5g50920	CLPC1; ATP binding / ATP-dependent peptidase/ ATPase	Yes	Yes	no	29	20	0	2411	thylakoid membrane (sensu Viridiplantae) & mitochondrion & chloroplast stroma & chloroplast	Y	C	envelope-inner-peripheral-stromal-side; plastid stroma	-	0	103.45	6.36	929	15028209(Total chloroplast); 12938931(Total chloroplast envelope); 12766230(Total chloroplast envelope); MitoDB(Mitochondrial proteome); 14593120(Plastid Stroma); 15322131(Thylakoid-stripped); 16207701(chloroplast stroma); 16287169(Cell Wall proteome); 15	-
At1g50250	FTSH1 (FtsH protease 1); ATP-dependent peptidase/ ATPase/ metallopeptidase	no	Yes	no	0	3	0	276	thylakoid membrane (sensu Viridiplantae) & chloroplast	Y	C	thylakoid-integral	2	0	76.76	5.63	716	15028209(Total chloroplast); 11719511(Thylakoid lumen proteome); 15322131(Thylakoid-stripped); 15276459(epidermis);	-
At2g30950	VAR2 (VARIEGATED 2); ATP-dependent peptidase/ ATPase/ metallopeptidase/ zinc ion binding	no	Yes	no	0	1	0	352	thylakoid membrane (sensu Viridiplantae) & chloroplast	Y	C	thylakoid-integral	1	1	74.15	5.99	695	15028209(Total chloroplast); 12938931(Total chloroplast envelope); 11719511(Thylakoid lumen proteome); 14729914(thylakoid-pheripheral&lumen); 14729914(thylakoid stripped); 15322131(Thylakoid-stripped); 15815986(Silique); 15815986(seedling); 15815986(Leaf)	-
At2g24395	chaperone protein dnaJ-related	no	Yes	no	0	1	0	-	-	Y	C	-	-	0	15.06	8.93	132	-	-
At1g18170	immunophilin / FKBP-type peptidyl-prolyl cis-trans isomerase family protein	no	Yes	no	0	3	0	9	thylakoid membrane (sensu Viridiplantae)	Y	C	thylakoid-peripheral-lumenal-side	1	0	26.53	8.96	247	15322131(Thylakoid-stripped);	-
At3g13470	chaperonin, putative	Yes	Yes	no	2	2	0	1248	mitochondrion	Y	C	plastid stroma	-	0	63.34	5.59	596	12938931(Total chloroplast envelope); MitoDB(Mitochondrial proteome); 14617066(Nuclear proteome); 16207701(chloroplast stroma); 15496452(nucleolus); 15821981(crude&pure 80S ribosome); 16358359(cell suspension (Gamborg)); 15815986(Silique); 15815986(seedli	-
At2g28000	CPN60A (CHAPERONIN-60ALPHA); ATP binding / protein binding	Yes	no	no	2	0	0	1195	mitochondrion & chloroplast	Y	C	plastid stroma	-	0	62.07	5.08	586	15028209(Total chloroplast); 12938931(Total chloroplast envelope); MitoDB(Mitochondrial proteome); 11826309(thylakoid peripheral&lumen); 16207701(chloroplast stroma); 15821981(crude&pure 80S ribosome); 16358359(cell suspension (Gamborg)); 16358359(cell su	-
At5g49910	CPHSC70-2EAT SHOCK PROTEIN 70-2 (CHLOROPLAST HEAT SHOCK PROTEIN 70-2); ATP binding / unfolded protein binding	Yes	no	no	4	0	0	807	plastid stroma	Y	C	plastid stroma	-	0	76.99	5.17	718	15028209(Total chloroplast); 12938931(Total chloroplast envelope); 16207701(chloroplast stroma); 16358359(cell suspension (Gamborg)); 16358359(cell suspension (M&Skoog)); 16502469(cell suspension-Cd-up); 15815986(Silique); 15815986(seedling); 15815986(Lea	-
At4g24280	cpHsc70-1 (chloroplast heat shock protein 70-1); ATP binding	Yes	no	no	5	0	0	818	plastid stroma	Y	C	plastid stroma	-	0	76.5	5.06	718	15028209(Total chloroplast); 12938931(Total chloroplast envelope); 14617066(Nuclear proteome); 11826309(thylakoid peripheral&lumen); 16207701(chloroplast stroma); 16358359(cell suspension (Gamborg)); 16358359(cell suspension (M&Skoog)); 16502469(cell susp	-
At5g55220	trigger factor type chaperone family protein	Yes	no	no	1	0	0	199	-	Y	C	plastid stroma	-	0	61.73	5.25	547	12938931(Total chloroplast envelope); 12766230(Total chloroplast envelope); 16207701(chloroplast stroma); 16358359(cell suspension (Gamborg)); 15815986(Silique); 15815986(seedling); 15815986(Leaf);	-
At1g05385	photosystem II 11 kDa protein-related	no	Yes	no	0	1	0	-	-	Y	C	-	-	0	22.27	8.43	199	18431481(chloroplast);	-
At4g37200	HCF164; oxidoreductase, acting on sulfur group of donors, disulfide as acceptor	no	Yes	no	0	2	0	5	thylakoid membrane (sensu Viridiplantae)	Y	C	thylakoid-peripheral-stromal-side	-	0	28.74	5.26	261	15028209(Total chloroplast); 15322131(Thylakoid-stripped);	-
At5g23120	HCF136; protein binding	no	Yes	no	0	1	0	124	thylakoid membrane (sensu Viridiplantae) & thylakoid lumen (sensu Viridiplantae) & chloroplast stromal thylakoid	Y	C	thylakoid-peripheral-lumenal-side	-	0	44.1	6.79	403	15028209(Total chloroplast); 11719511(Thylakoid lumen proteome); 14729914(thylakoid-pheripheral&lumen); 14729914(thylakoid stripped); 11826309(thylakoid peripheral&lumen); 15322131(Thylakoid-stripped); 16207701(chloroplast stroma); 16502469(cell suspensio	-
At5g53580	aldo/keto reductase family protein	no	Yes	no	0	3	0	3	-	Y	_	plastid	-	0	40.57	9.31	365	-	-
At2g21370	xylulose kinase, putative	Yes	no	no	3	0	0	2	cytoplasm	Y	M	plastid	-	0	52.46	6.36	478	-	15610358(Cytosol -SUBA);
At3g52750	FTSZ2-2; GTP binding / GTPase/ structural molecule	Yes	no	no	1	0	0	41	chloroplast stroma & chloroplast	-	_	plastid stroma	-	0	50.31	5.67	473	-	11554751(Plastid -SUBA);
At3g18390	EMB1865 (embryo defective 1865); RNA binding	Yes	no	no	2	0	0	-	-	Y	C	-	-	0	96	5.76	848	18431481(chloroplast); 19525416(leaf (wt and clpr4-1 mutant)); 20423899(chloroplast); 19888209(leaves); 19376835(leaf phosphoproteins);	-
At1g22530	PATL2 (PATELLIN 2); transporter	Yes	Yes	no	1	2	0	-	-	-	_	-	-	0	76.01	4.92	683	15028209(Total chloroplast); 16618929(UNKNOWN-LOPIT-callus); 17317660(Plasma Membrane proteome); 17848588(total seedling); 17828791(total leaf); 17293592(total seedlings Ã» light and dark grown); 17644812(plasma membrane - suspension cells); 18814325(coty	-
At1g72160	SEC14 cytosolic factor family protein / phosphoglyceride transfer family protein	no	Yes	no	0	1	0	-	-	-	-	-	-	0	56.11	5.21	490	17317660(Plasma Membrane proteome); 18538804(total leaf); 18463617(suspension cells-phosphorylated proteins); 19245862(nuclear phosphoproteins (seedlings & cell culture)); 19525416(leaf (wt and clpr4-1 mutant)); 17216043(leaf); 19334764(plasma membrane (c	-
At5g63060	transporter	no	Yes	no	0	2	0	-	-	Y	C	plastid	1	0	30.15	8.95	263	18431481(chloroplast); 19525416(leaf (wt and clpr4-1 mutant));	-
At1g72150	PATL1 (PATELLIN 1); transporter	no	Yes	no	0	2	0	5	-	-	_	-	-	0	64.04	4.82	573	15028209(Total chloroplast); 14760709(Vacuolar proteome); 15815986(seedling); 15815986(Leaf);	-
At5g10910	mraW methylase family protein	Yes	no	no	4	0	0	-	-	Y	C	-	-	0	48.62	9.35	434	-	-
At4g34120	LEJ1 (LOSS OF THE TIMING OF ET AND JA BIOSYNTHESIS 1)	Yes	Yes	yes	6	5	3	26	-	Y	C	plastid stroma	-	0	25.95	7.93	238	15028209(Total chloroplast);	-
At4g35250	vestitone reductase-related	no	Yes	no	0	1	0	82	-	Y	C	thylakoid	-	0	43.72	8.7	395	15028209(Total chloroplast); 15815986(Leaf);	-
At5g23760	heavy-metal-associAted domain-containing protein	no	Yes	no	0	1	0	-	-	-	-	-	-	0	11.57	8.61	103	19525416(leaf (wt and clpr4-1 mutant));	-
At3g52920	unknown protein	no	Yes	no	0	1	0	-	-	-	C	-	-	0	20.67	6.53	180	17317660(Plasma Membrane proteome);	-
At5g10860	CBS domain-containing protein	Yes	Yes	no	1	4	0	-	mitochondrion	Y	M	-	-	0	22.73	9.1	206	MitoDB(Mitochondrial proteome); 16358359(cell suspension (Gamborg)); 15815986(seedling); 15815986(Leaf); 17916636(root (NaCl stress)); 18385124(mitochondria - leaf and suspension cell); 18385124(mitochondria); 19995728(proplastid (Brassica napus)); 192001	-
At5g49360	BXL1 (BETA-XYLOSIDASE 1); hydrolase, hydrolyzing O-glycosyl compounds	no	Yes	no	0	1	0	8	-	-	S	-	-	1	83.52	8.79	774	15815986(Silique);	-
At1g53280	DJ-1 family protein	Yes	no	no	1	0	0	14	-	Y	C	plastid	-	0	46.99	7.98	438	-	-
At2g34460	flavin reductase-related	no	Yes	no	0	15	0	74	thylakoid membrane (sensu Viridiplantae)	Y	C	plastoglobules	-	0	30.47	9.03	280	15028209(Total chloroplast); 12938931(Total chloroplast envelope); 12766230(Total chloroplast envelope); 15322131(Thylakoid-stripped); 16414959(plastoglubular); 16461379(plastoglubular);	-
At4g20260	DREPP plasma membrane polypeptide family protein	no	Yes	no	0	4	0	11	-	-	_	-	-	0	24.58	4.99	225	15028209(Total chloroplast); 15060130(Plasma Membrane proteome); 15539469(vacuole); 15815986(seedling); 15815986(Leaf);	15060130(Plasma Membrane -SUBA);
At3g25690	CHUP1 (CHLOROPLAST UNUSUAL POSITIONING 1)	no	Yes	no	0	1	0	2	-	-	S	-	-	0	111.91	5.43	1004	-	14615600(Plastid -SUBA);
At5g07020	proline-rich family protein	no	Yes	no	0	1	0	7	thylakoid membrane (sensu Viridiplantae)	Y	_	thylakoid	1	0	24.39	4.71	235	15028209(Total chloroplast); 15322131(Thylakoid-stripped);	-
At1g52510	hydrolase, alpha/beta fold family protein	Yes	no	no	2	0	0	15	-	Y	C	plastid stroma	-	0	41.84	6.55	380	15028209(Total chloroplast); 12938931(Total chloroplast envelope);	-
At3g20720	Unknown	no	no	yes	0	0	1	-	-	-	M	-	-	0	122.85	5.19	1199	19546170(mature pollen grains);	-
At5g27560	Unknown	no	no	yes	0	0	3	6	-	Y	C	plastid	-	0	38.04	4.73	341	-	-
At5g23060	CaS (Calcium sensing receptor)	no	Yes	no	0	1	0	153	thylakoid membrane (sensu Viridiplantae) & mitochondrion	Y	C	thylakoid-integral	1	1	41.28	9.41	387	15028209(Total chloroplast); MitoDB(Mitochondrial proteome); 14729914(thylakoid stripped); 15322131(Thylakoid-stripped);	-
At4g18740	transcription termination factor	Yes	no	no	2	0	0	-	-	-	M	-	-	0	27.33	9.92	245	-	-
At5g01730	AtSCAR4	Yes	no	no	1	0	0	-	-	-	_	-	-	0	128.62	4.56	1170	16461379(plastoglubular); 18431481(chloroplast);	-
At1g61097	Expressed protein	no	Yes	no	0	1	0	-	-	-	-	-	-	0	15.48	9.18	134	-	-
At1g64430	FUNCTIONS IN: molecular_function unknown; INVOLVED IN: biological_process unknown; EXPRESSED IN: carpel; EXPRESSED DURING: 4 anthesis; CONTAINS InterPro DOMAIN/s: PentAtricopeptide repeAt (InterPro:IPR002885); Has 22 Blast hi	no	Yes	no	0	1	0	-	-	Y	C	-	2	0	61.62	5.73	559	-	-
At5g50100	FUNCTIONS IN: molecular_function unknown; INVOLVED IN: biological_process unknown; LOCATED IN: mitochondrion; EXPRESSED IN: 22 plant structures; EXPRESSED DURING: 15 growth stages; CONTAINS InterPro DOMAIN/s: Thioredoxin-like	no	Yes	no	0	6	0	2	-	Y	M	-	-	0	24.43	9.29	214	-	-
At1g55480	binding / protein binding	Yes	Yes	no	2	11	0	61	thylakoid membrane (sensu Viridiplantae)	Y	C	thylakoid-peripheral-stromal-side	-	0	37.41	8.18	335	15028209(Total chloroplast); 12938931(Total chloroplast envelope); 15322131(Thylakoid-stripped); 15815986(Silique); 15815986(seedling); 15815986(Leaf);	-
At4g31530	binding / catalytic	no	Yes	no	0	6	0	-	-	Y	C	plastid stroma	-	0	35.23	7.67	338	15028209(Total chloroplast); 12938931(Total chloroplast envelope); 18633119(stroma); 18431481(chloroplast); 19525416(leaf (wt and clpr4-1 mutant)); 20423899(chloroplast);	-
At4g02530	chloroplast thylakoid lumen protein	no	Yes	no	0	4	0	41	thylakoid membrane (sensu Viridiplantae) & thylakoid lumen (sensu Viridiplantae)	Y	C	thylakoid-peripheral-lumenal-side	-	0	23.66	8.54	216	15028209(Total chloroplast); 11719511(Thylakoid lumen proteome); 14729914(thylakoid-pheripheral&lumen); 14729914(thylakoid stripped); 11826309(thylakoid peripheral&lumen); 15322131(Thylakoid-stripped); 16207701(chloroplast stroma);	-
At5g48790	unknown protein	no	Yes	no	0	2	0	5	-	Y	C	thylakoid	-	0	35.86	8.12	316	-	-
At1g18060	unknown protein	no	Yes	no	0	2	0	4	-	Y	C	thylakoid	-	0	25.19	9.67	226	15028209(Total chloroplast);	-
At5g08540	unknown protein	no	Yes	yes	0	1	3	75	thylakoid membrane (sensu Viridiplantae) & chloroplast envelope	Y	C	envelope	1	0	38.65	5.67	346	12938931(Total chloroplast envelope); 12766230(Total chloroplast envelope); 15322131(Thylakoid-stripped);	-
At5g08050	FUNCTIONS IN: molecular_function unknown; INVOLVED IN: biological_process unknown; LOCATED IN: thylakoid, chloroplast thylakoid membrane, chloroplast; EXPRESSED IN: 21 plant structures; EXPRESSED DURING: 13 growth stages; CON	no	Yes	no	0	2	0	32	thylakoid membrane (sensu Viridiplantae)	Y	C	thylakoid	2	2	16.58	9.3	158	15028209(Total chloroplast); 14729914(thylakoid stripped); 15322131(Thylakoid-stripped);	-
At2g01050	zinc ion binding;nucleic acid binding	no	no	yes	0	0	1	-	-	-	_	-	-	0	56.34	8.36	404	-	-
At4g34240	ALDH3I1 (ALDEHYDE DEHYDROGENASE 3	no	Yes	no	0	3	0	21	-	Y	_	-	2	0	60.17	8.73	550	15028209(Total chloroplast);	-
At1g64190	6-phosphogluconate dehydrogenase family protein	Yes	no	no	1	0	0	71	-	-	S	plastid	-	0	53.37	5.33	487	15052571(soluble leaf);	-
At3g01500	CA1 (CARBONIC ANHYDRASE 1); carbonate dehydratase/ zinc ion binding	Yes	no	no	1	0	0	1330	thylakoid membrane (sensu Viridiplantae)	-	_	plastid stroma	-	0	29.5	5.53	270	15028209(Total chloroplast); 12938931(Total chloroplast envelope); 12766230(Total chloroplast envelope); 11826309(thylakoid peripheral&lumen); 15322131(Thylakoid-stripped); 16923014(cold-stress responsive chloroplast); 15815986(Silique); 15815986(seedling	-
At2g27730	unknown protein	no	Yes	no	0	2	0	-	mitochondrion & mitochondrial membrane & NADH dehydrogenase complex (ubiquinone)	-	M	mitochondria	1	1	11.95	9.64	113	MitoDB(Mitochondrial proteome); 15276431(Mitochondrial proteome); 15539469(vacuole); 15496452(nucleolus); 16618929(UNKNOWN-LOPIT-callus); 15276431(mitochondrial membranes-suspension cells); 12837548(mitochondria-complex_I); 18385124(mitochondria - leaf an	15141064(mitochondrion -SUBA); 15496452(nucleus -SUBA); 15496452(unclear -SUBA);
At3g10860	ubiquinol-cytochrome C reductase complex ubiquinone-binding protein, putative / ubiquinol-cytochrome C reductase complex 8.2 kDa protein, putative	no	Yes	no	0	1	0	-	mitochondrion	-	-	-	-	0	8.51	9.48	72	MitoDB(Mitochondrial proteome); 17432890(leaf total membranes); 19546170(mature pollen grains); 19334764(plasma membrane (cell culture)); 20706207(contaminants cell cycle interactome (cell culture));	-
At2g21870	unknown protein	no	Yes	no	0	3	0	-	mitochondrion	-	M	-	-	0	27.6	6.27	240	MitoDB(Mitochondrial proteome); 15276431(Mitochondrial proteome); 15496452(nucleolus); 16242667(mature Pollen); 16247729(mature Pollen); 15815986(Silique); 15815986(seedling); 15815986(Leaf); 16618929(MITO/PLASTID-LOPIT-callus); 15276431(mitochondrial mem	15496452(nucleus -SUBA); 15496452(unclear -SUBA);
At2g33040	ATP synthase gamma chain, mitochondrial (ATPC)	no	Yes	no	0	5	0	-	mitochondrion & nucleus & cytoplasm	-	M	mitochondria	-	0	35.45	9.01	325	15028209(Total chloroplast); MitoDB(Mitochondrial proteome); 15276431(Mitochondrial proteome); 16287169(Cell Wall proteome); 15496452(nucleolus); 16618929(MITO/PLASTID-LOPIT-callus); 15276431(mitochondrial membranes-suspension cells); 17293592(total seedl	15610358(unclear -SUBA);
