# Supplementary material for: Complementary biochemical approaches applied to the identification of plastidial calmodulin-binding proteins
Source: Royal Society of Chemistry journal article supplement (doi:10.1039/c3mb00004d), 2013-03-12
Supplement: c3mb00004d_2.xlsx [file c3mb00004d_2.xlsx]

## Sheet: Foglio1
Accession number	protein name	vector	Cloning sites	His-Tag	MW cloned protein + tag	soluble?	predicted pI	Primer 5'	Primer 3'	cloned protein sequence
At5g23060	CAS	pet28b (+)	NdeI-XhoI	yes (Nter)	40.1	no	9.26	ctgagtctgagacaaCATATGgtttcacttccaac	CTATATATATCCTCGAGTTTCAGTCGGAGCTAG	MGSSHHHHHHSSGLVPRGSHMVSLPTSTSISLLSLFASPPHEAKAAVSIPKDQIVSSLTEVEKTINQVQETGSSVFDATQRVFQVVGDALKPALDTALPIAKQAGEEAMKLASPAFSEASKKAQEAMQSSGFDSEPVFNAAKTVTDVAQQTSKAIEDAKPIASSTMDTISSADPSVIVVAAGAAFLAYLLLPPVFSAISFNFRGYKGDLTPAQTLDLLCTKNYLMVDIRSEKDKEKAGIPRLPSNAKNRVISIPLEELPNKVKGIVRNSKRVEAEIAALKISYLKKINKGSNIIILDSYTDSAKIVAKTLKVLGYKNCYIVTDGFSGGRGWLQSRLGTDSYNFSFAQVLSPSRIIPAASRSFGTRSGTKFLPSSD
At1g53280	DJ1	pet28b (+)	NheI-XhoI	yes (Nter)	43.9	yes	6.09	ctatctctgcaactGCTAGCtcatctactaagaag	CTTACCTAAGATACTCGAGAGTTTACACAAGTG	MGSSHHHHHHSSGLVPRGSHMASMSSSTKKVLIPVAHGTEPFEAVVMIDVLRRGGADVTVASVENQVGVDACHGIKMVADTLLSDITDSVFDLIMLPGGLPGGETLKNCKPLEKMVKKQDTDGRLNAAICCAPALAFGTWGLLEGKKATCYPVFMEKLAACATAVESRVEIDGKIVTSRGPGTTMEFSVTLVEQLLGKEKAVEVSGPLVMRPNPGDEYTITELNQVSWSFEGTPQILVPIADGSEEMEAVAIIDVLKRAKANVVVAALGNSLEVVASRKVKLVADVLLDEAEKNSYDLIVLPGGLGGAEAFASSEKLVNMLKKQAESNKPYGAICASPALVFEPHGLLKGKKATAFPAMCSKLTDQSHIEHRVLVDGNLITSRGPGTSLEFALAIVEKF…
At1g65260	Vipp1	pet30a (+)	NcoI-SacI	yes (Nter)	35.2	no	6.48	Gtgttgaccatggcttgtgataatagactcaggtgc	cggaaagagctcatatctaaaagtcgttagctttcc	MHHHHHHSSGLVPRGSGMKETAAKFGRQHMDSPDLGTDDDDKAMACDNRLRCNGHGATMNLFERFSRVVKSYANALISSFEDPEKILEQTVIEMNSDLTKMRQATAQVLASQKQLQNKYKAAQQSSDDWYKRAQLALAKGDEDLAREALKRRKSFADNATALKTQLDQQKGVVDNLVSNTRLLESKIQEAKAKKDTLLARARTAKTATKVQEMIGTVNTSGALSAFEKMEEKVMAMESEADALTQIGTDELEGKFQMLETSSVDDDLADLKKELSGSSKKGELPPGRSTVAASTRYPFKDSEIENELNELRRKANDF
At1g80480	pTAC17	pet28b (+)	NdeI-XhoI	yes (Nter)	43.5	yes	5.7	ctcagctacgcagactCaTATGtctgatgtcaccactaag	GCCGGTGACCATTTCCTCGAGATACATAGAGCTAG	MGSSHHHHHHSSGLVPRGSHMSDVTTKIPPDNRIPATIITGFLGSGKTTLLNHILTRDHGKRIAVIENEFGEVDIDGSLVASKSIGAEDIVMLNNGCLCCTVRGDLVRMIGELVNTKKGKFDHIVIETTGLANPAPIIQTFYAEEEIFNDVKLDGVVTLVDAKHARLHLDEVKPEGVVNEAVEQIAYADRIIVNKTDLVGEAELGSVVQRIKTINSMAQMTRTKYGNVDLDYVLGIGGFDLERIESSVNEDDKGDHHDHDHDHHHDHNHDHDHHHHDGHDHHHHSHDHTHDPGVSSVSIVCEGSLDLEKANMWLGTLLMERSEDIYRMKGLLSVHTMEERFVFQGVHDIFQGSPDRLWGREEERVNKIVFIGKNLNREELEKGFKACLI
At4g23430	Tic32	pet20b (+)	NdeI-bamHI	No	34.7	yes	8.95	ctgacatatgtggttttttggatcgaaagg	catcggatcctttcaagaactgctttctc	MWFFGSKGASGFSSRSTAEEVTHGVDGTGLTAIVTGASSGIGVETARVLSLRGVHVVMAVRNTDSGAKVKEDIVKQVPGAKLDVMELDLSSMQSVRKFASEYKSTGLPLNLLINNAGIMACPFMLSKDNIELQFATNHLGHFLLTKLLLDTMKSTSRESKREGRIVNLSSEAHRFSYPEGVRFDKINDKSSYSSMRAYGQSKLCNVLHANELTKQLKEDGVNITANSLHPGAIMTNLGRYFNPYLAVAVGAVAKYILKSVPQGAATTCYVALNPQVAGVSGEYFQDSNIAKPLPLVKDTELAKKVWDFSTKLTDSQSGESSS
At5g35630	GS2	pet28b (+)	NdeI-XhoI	yes (Nter)	44.3	yes	5.75	Ggatcatcaatccaatggctcagatc	ccacatagactcgagtgttcatcagattcatg	MGSSHHHHHHSSGLVPRGSHMLALQSDNSTVNRVETLLNLDTKPYSDRIIAEYIWIGGSGIDLRSKSRTIEKPVEDPSELPKWNYDGSSTGQAPGEDSEVILYPQAIFRDPFRGGNNILVICDTWTPAGEPIPTNKRAKAAEIFSNKKVSGEVPWFGIEQEYTLLQQNVKWPLGWPVGAFPGPQGPYYCGVGADKIWGRDISDAHYKACLYAGINISGTNGEVMPGQWEFQVGPSVGIDAGDHVWCARYLLERITEQAGVVLTLDPKPIEGDWNGAGCHTNYSTKSMREEGGFEVIKKAILNLSLRHKEHISAYGEGNERRLTGKHETASIDQFSWGVANRGCSIRVGRDTEAKGKGYLEDRRPASNMDPYIVTSLLAETTLLWEPTLEAEALAAQKLS…
At5g63420	RNAseJ	pet28b (+)	NheI-EcoRI	yes (Nter)	95.5	no	7.41	cttgagctagcatgtcatcctctaagacgccac	caaggaattcttaagacgcaggtgtgcctagc	MGSSHHHHHHSSGLVPRGSHMSSSKTPRRRSGRLEGVGKSMEDSVKRKMEQFYEGTDGPPLRILPIGGLGEIGMNCMLVGNYDRYILIDAGIMFPDYDEPGIQKIMPDTGFIRRWKHKIEAVVITHGHEDHIGALPWVIPALDPNTPIFASSFTMELIKKRLKEHGIFVQSRLKTFSTRRRFMAGPFEIEPITVTHSIPDCSGLFLRCADGNILHTGDWKIDEAPLDGKVFDREALEELSKEGVTLMMSDSTNVLSPGRTISEKVVADALVRNVMAAKGRVITTQFASNIHRLGSIKAAADITGRKLVFVGMSLRTYLEAAWRDGKAPIDPSSLIKVEDIEAYAPKDLLIVTTGSQAEPRAALNLASYGSSHAFKLTKEDIILYSAKVIPGNESRVMKM…
At1g59990	RH22	pet28b (+)	NheI-BamHI	yes (Nter)	60.2	yes	5.63	cttggctagcAtggcagaagtcgagaaaaag	caagggatccttaatatctcacagcttgagG	MGSSHHHHHHSSGLVPRGSHMASMAEVEKKGNDTFFADHTVSWKSLGLSDNVSIALRDSGFDRPSLTQAVCIPSILSGKDVIVAAETGSGKTHGYLAPIIDQLTNTALDSEVTNREERPFPLKNISLILCPNVMLCEQVVRMVNGLVDEDGNPLLRVEAVCGSQGWPDRLPDIIVSTPAALLNNIEPKRNRRLEFLRCVKYVVFDEADMLLCGSFQNQIIRLINMLRFDEKQVSRLAKSNLGRPMEIDASVPQIDLENEDDAEFDEGSISEEEDEEEEEEYLDDIAQMPSVEAEAGSDTKKGWEKE
At1g17220	FUG1	pet28b (+)	NdeI-SalI	yes (Nter)	105.5	yes	6.36	cttgcatATGTCTTCAACTACTACTAC	caaggtcgacTTAAACTCCAGCCTCTTCAAT	MGSSHHHHHHSSGLVPRGSHMSSTTTTTADFIADQNNNSVSIDSNSFRGSKDGDDSEVVLKQTPKPVLKPPVARVERGLGVNTAPWSKDLSNGGKFDGEEERNKVIESLGEVLDKAEKLEIPKPGNKEGGEAVKPSQPSANSSNSRNGSYANASDGGTRKTKTMKSVWRKGDAVAAVQKVVKESPKIFNRGVQTEPRTREEGEVNAKAGTPLAPPQPPFRPQPPVRPQPMLQGKPMVAPPVKKSPILKDLGMAAKPLVSEEVDSSVKSKERKPILVDKFASKKKGVDPAASQAVLAPTKPGKGPPSNKFRVEHRNKKNASASPRRRIVAEDDGDDDASISRSGRKGRKWSKASRKAVRLQAAKDAAPVKAEILEVEEEGMSIEDLAYNLAIGEGDILGY…
At5g10910	MRAW	pet28b (+)	NdeI-HindIII	yes (Nter)	46.5	no	8.91	ggaaatcatatgtcgagcgagactaagaag	GTCATAAAGCTTTCACAACTTCTGAATCACTCTTAAC	MGSSHHHHHHSSGLVPRGSHMMSSETKKKEKEKRKRRKEIEVEKATAEAVVNKEKRRTRSSRGYELADGDEVPSSHVPVMLGEVLDIFSSVRLRSFVDCTLGAAGHSSSIIQSHSELKNFVGMDVDPVARKLGHFHIDSLMHPTLKASIVLKNFKYIKSVIADTQPELLDVGVDGILMDLGMSSMQVNNPERGFSVLQEGPLDMRMDPQATLTAEDIVNSWPESELGRVLRDYGEESNWYLLQNRIVKARLNGGLHSTGELVDLIRGTSPASRGGRQGWIKTATRVFQGLRIAVNDELKTLQNSLYSSFDVLAPGGRLAVISFHSLEDRVVKQTFLDILGFQREEINGEGSSVKPERQIEERVEKELKEKEEWIKQTVIASKGVILTKRPITPSEEEER…
At4g01800	SecA	pet28b (+)	EcoRI-XhoI	yes (Nter)	114.7	yes	6.29	ctggagaattcatgtgctctcggaagagaagc	CGTTTACTCGAGTTAGGCGCTTGCAATTGAGG	MGSSHHHHHHSSGLVPRGSHMASMTGGQQMGRGSEFMCSRKRSTSVNASLGGLLSGIFKGSDNGESTRQQYASIVASVNRLETEISALSDSELRERTDALKQRAQKGESMDSLLPEAFAVVREASKRVLGLRPFDVQLIGGMVLHKGEIAEMRTGEGKTLVAILPAYLNALSGKGVHVVTVNDYLARRDCEWVGQVPRFLGLKVGLIQQNMTPEQRKENYLCDITYVTNSELGFDYLRDNLATSVEELVLRDFNYCVIDEVDSILIDEARTPLIISGPAEKPSDQYYKAAKIASAFERDIHYTVDEKQKTVLLTEQGYEDAEEILDVKDLYDPREQWASYVLNAIKAKELFLRDVNYIIRAKEVLIVDEFTGRVMQGRRWSDGLHQAVEAKEGLPIQNE…
At1g72810	TS2	pet23d (+)	NcoI-XhoI	No	53.2	yes	8.0	GTTGCACCTTCATGACTCCCGCCGTTCCTC	GAAgaaacaaactcgagaagcttatttatcattgctcttc	MTPAVPPQTPQKPRRSPDENIRDEARRRPHQLQNLSARYVPFNAPPSSTESYSLDEIVYRSQSGALLDVQHDFAALKRYDGEFWRNLFDSRVGKTNWPYGSGVWSKKEWVLPEIDDDDIVSAFEGNSNLFWAERFGKQYLQMNDLWVKHCGISHTGSFKDLGMSVLVSQVNRLRKMNKPVIGVGCASTGDTSAALSAYCASAGIPSIVFLPADKISMAQLVQPIANGAFVLSIDTDFDGCMHLIREVTAELPIYLANSLNSLRLEGQKTAAIEILQQFNWQVPDWVIVPGGNLGNIYAFYKGFHMCKELGLVDRIPRLVCAQAANANPLYLHYKSGFKEDFNPLKANTTFASAIQIGDPVSIDRAVYALKKSNGIVEEATEEELMDATALADSTGMFIC…
At2g37500	ArgJ	pet28b (+)	NdeI-SalI	yes (Nter)	48.1	no	6.23	gcctaagagttttgtgCATATGtcacggagagaattaag	CAGTAAATGAAACTCTGTCGACCGGTCTCAGTTCTATG	MGSSHHHHHHSSGLVPRGSHMMSRRELRVFAVATTVEEASGNIPAAPISLPQGSWKQIAGGVTAAKGFKAAGMYAGLRAAGKKPDLALVTCDVEAVAAGVFTTNVVAAAPVVYCKKVLETSKTARAVLINAGQANAATGDAGYQDMLDCVGSIATLLKVKPEEVLIESTGVIGQRIKKEELLHALPTLVNSRSDSVEEADSAAVAITTTDLVSKSVAVESQVGGIKIRVGGMAKGSGMIHPNMATMLGVITTDALVESDIWRKMVKVAVNRSFNQITVDGDTSTNDTVIALASGLSGSPSISSLNCKEAAQLQACLDAVMQGLAKSIAWDGEGATCLIEVTVKGTETEAEAAKIARSVASSSLVKAAVYGRDPNWGRIAAAAGYAGVSFQMDKLKISLG…
At1g74470	GGR	pet30a (+)	NcoI-XhoI	yes (Nter)	51.9	no	8.45	cggacctctctccgagCCaTGgcagccagagccactc	GAAAGGAGATAGACCTCGAGATTTGTTTCTTAAAC	MHHHHHHSSGLVPRGSGMKETAAKFGRQHMDSPDLGTDDDDKAMAARATPKLSNRKLRVAVIGGGPAGGAAAETLAQGGIETILIERKMDNCKPCGGAIPLCMVGEFNLPLDIIDRRVTKMKMISPSNIAVDIGRTLKEHEYIGMVRREVLDAYLRERAEKSGATVINGLFLKMDHPENWDSPYTLHYTEYDGKTGATGTKKTMEVDAVIGADGANSRVAKSIDAGDYDYAIAFQERIRIPDEKMTYYEDLAEMYVGDDVSPDFYGWVFPKCDHVAVGTGTVTHKGDIKKFQLATRNRAKDKILGGKIIRVEAHPIPEHPRPRRLSKRVALVGDAAGYVTKCSGEGIYFAAKSGRMCAEAIVEGSQNGKKMIDEGDLRKYLEKWDKTYLPTYRVLDVLQ…
At5g01920	STN8	pet28b (+)	NdeI-XhoI	yes (Nter)	52.2	no	9.44	GGGTTGTATGcatatggGCAGTTTTTCTCCGC	CATCATAACTCGAGAAATCAGAGTCACTTGCTGAAAC	MGSSHHHHHHSSGLVPRGSHMGSFSPQDIPVDSLSHLPPFLDFQNSLATFSDTQKWGFFVSAGIVWFYLTARPGVLIGAIDAYLLAPLQLGLDTLIGRRLKRSDFLVTEKLGEGSFGVVYAGVLLPKNSTLVDDVRVSKARAKAMDFTGEFKQRVILKKVKVGVRGAEEFGEYEEWFNYRLSRAAPDTCAEFLGSFVADKTNTMFTKGGKWLVWRFEGDRDLADYMKDRSFPSNLESIMFGRVLQGVESVKRRALIIKQIMRQIITSLRKIHGTGIVHRDVKPANLVVTKKGQIKLIDFGAAADLRIGKNYIPERTLLDPDYCPPELYVLPEETPSPPPEPIAALLSPILWQLNSPDLFDMYSAGIVLLQMAVPTLRSTAGLKNFNLEIKSVEYDLNRW…
At3g45140	Lox2	pet28b (+)	NdeI-BamHI	yes (Nter)	98	yes	5.31	cttggctagcATGGCTAATATTGAACAAG	gaacggatccTCAAATAGAAATACTATAAGG	MGSSHHHHHHSSGLVPRGSHMANIEQEGNTVKEPIQNIKVKGYITAQEEFLEGITWSRGLDDIADIRGRSLLVELISAKTDQRITVEDYAQRVWAEAPDEKYECEFEMPEDFGPVGAIKIQNQYHRQLFLKGVELKLPGGSITFTCESWVAPKSVDPTKRIFFSDKSYLPSQTPEPLKKYRKEELETLQGKNREEVGEFTKFERIYDYDVYNDVGDPDNDPELARPVIGGLTHPYPRRCKTGRKPCETDPSSEQRYGGEFYVPRDEEFSTAKGTSFTGKAVLAALPSIFPQIESVLLSPQEPFPHFKAIQNLFEEGIQLPKDAGLLPLLPRIIKALGEAQDDILQFDAPVLINRDRFSWLRDDEFARQTLAGLNPYSIQLVEEWPLISKLDPAVYGDPT…
At2g21370	XK-like1	pet28b (+)	NdeI-XhoI	yes (Nter)	49.5	yes	6.24	Ctccgatttcagacatatgagtggcaat	gaaaatgtgttctcgagctctggtcttg	MGSSHHHHHHSSGLVPRGSHMSGNKGTNYEKLYLGMDFGTSGGRFTVIDEQGEIKAQGKREYPPFMKEESMGWASSWKATLFSLLEDIPVTVRSLVSSISLDGTSATTLILNSESGEVLCQPYLYNQSCPDALPEVKSIAPANHTVCSGTSTLCKLVSWWNTEVPNRESAVLLHQADWLLWLLHGRLGVSDYNNALKVGYDPESESYPSWLLGQPYSQLLPKVQAPGTSIGNLKESFTRQFGFPDDCIVCTGTTDSIAAFLAARATEPGKAVTSLGSTLAIKLLSTKRVDDARYGVYSHRLDDKWLVGGASNTGGAILRQLFSDEQLERLSQEINPMVGSPLDYYPLQSSGERFPIADPNLAPRLLPRPESDVEFLHGILESIARIEGKGYKLLKELGA…
At2g33040	ATPCγMit	pet28b (+)	BamHI-XhoI	yes (Nter)	34.4	no	8.85	GTTGGATCCATCTCAACTCAAGTGGTGCGTAAG	GAAAAGAGAACTAACCTCGAGGGGCTTATTTAGCAG	MGSSHHHHHHSSGLVPRGSHMASMTGGQQMGRGSISTQVVRNRMKSVKNIQKITKAMKMVAASKLRAVQGRAENSRGLWQPFTALLGDNPSIDVKKSVVVTLSSDKGLCGGINSTVVKVSRALYKLNAGPEKEVQFVIVGEKAKAIMFRDSKNDIVLSVTELNKNPLNYAQVSVLADDILKNVEFDALRIVYNKFHSVVAFLPTVSTVLSPEIIEKESEIGGKLGELDSYEIEGGETKGEILQNLAEFQFSCVMFNAVLENACSEMGARMSAMDSSSRNAGEMLDRLTLTYNRTRQASITTELIEIISGASALEAAK
At1g09795	PRT2	pet28b (+)	NdeI-BamHI	yes (Nter)	39.5	yes	6.36	ggtgccaccgattccCATATGgtcgtcgggcgggag	CTGACTAAACCAAAGGGATCCTGAGAAGCAGCATC	MGSSHHHHHHSSGLVPRGSHMVVGREQIRLGLPSKGRMAADSLDLLKDCQLFVKQVNPRQYVAQIPQLPNTEVWFQRPKDIVRKLLSGDLDLGIVGLDIVGEFGQGNEDLIIVHEALNFGDCHLSLAIPNYGIFENIKSLKELAQMPQWTEERPLRVATGFTYLGPKFMKDNGIKHVTFSTADGALEAAPAMGIADAILDLVSSGTTLKENNLKEIEGGVVLESQAALVASRRALTERKGALETVHEILERLEAHLKANGQFTVVANMRGTDAEEVAERVKTQPSLSGLQGPTISPVYCKRDGKVTIEYYAIVICVPKKALYESVQQLRAVGGSGVLVSPVTYIFHEETPRWSQLLSNLGL
At4g04640	ATPCγChl	pet28b (+)	NcoI-EcoRI	No	41	no	8.14	CTCCTTCCATGGCTTCCTCTGTTTCACCAC	GAAGATTCAAAGAGAATTCAAAACAAATCAAACCTG	MACSNLTTMWVSSKPSLSADSSSLSFRSVLKCPTNTSSPPSRASSVSPLQASLRELRDRIDSVKNTQKITMEAMKLVAAAKVRRAQEAVVNGRPFSETLVEVLYNINEQLQTDDVDVPLTKVRPVKKVALVVVTGDRGLCGGFNNFIIKKAEARIKELKGLGLEYTVISVGKKGNSYFLRRPYIPVDKYLEAGTLPTAKEAQAVADDVFSLFISEEVDKVELLYTKFVSLVKSEPVIHTLLPLSPKGEICDINGTCVDAAEDEFFRLTTKEGKLTVERETFRTPTADFSPILQFEQDPVQILDALLPLYLNSQILRALQESLASELAARMSAMSSASDNASDLKKSLSMVYNRKRQAKITGEILEIVAGANAQV
At2g22250	PAT	pet23d (+)	NcoI-XhoI	No	45.5	yes	5.95	GAATATGTCATCTAGAACCATGGCTATGGCCAAACCAAATG	CACATTTCTGTGCTCGAGCTGTTAAACGGAGAC	MAMAKPNDAETLSSSVDMSLSPRVQSLKPSKTMVITDLAATLVQSGVPVIRLAAGEPDFDTPKVVAEAGINAIREGFTRYTLNAGITELREAICRKLKEENGLSYAPDQILVSNGAKQSLLQAVLAVCSPGDEVIIPAPYWVSYTEQARLADATPVVIPTKISNNFLLDPKDLESKLTEKSRLLILCSPSNPTGSVYPKSLLEEIARIIAKHPRLLVLSDEIYEHIIYAPATHTSFASLPDMYERTLTVNGFSKAFAMTGWRLGYLAGPKHIVAACSKLQGQVSSGASSIAQKAGVAALGLGKAGGETVAEMVKAYRERRDFLVKSLGDIKGVKISEPQGAFYLFIDFSAYYGSEAEGFGLINDSSSLALYFLDKFQVAMVPGDAFGDDSCIRISYATS…
At1g21640	NADK2	pet30a (+)	NdeI-KpnI	Yes (Cter)	43.1	yes	5.6	GATTTGTGcatAtgGCGCAGCTCTCTGAAGC	CAGTCTGCTCATCAGGTACCCCCTTAC	MAQLSEAFSPDLGLDSQAVKSRDTSNLPWIGPVPGDIAEVEAYCRIFRSAERLHGALMETLCNPVTGECRVPYDFSPEEKPLLEDKIVSVLGCILSLLNKGRKEILSGRSSSMNSFNLDDVGVAEESLPPLAVFRGEMKRCCESLHIALENYLTPDDERSGIVWRKLQKLKNVCYDAGFPRSDNYPCQTLFANWDPIYSSNTKEDIDSYESEIAFWRGGQVTQEGLKWLIENGFKTIVDLRAEIVKDTFYQTALDDAISLGKITVVQIPIDVRMAPKAEQVELFASIVSDSSKRPIYVHSKEGVWRTSAMVSRWKQYMTRPITKEIPVSEESKRREVSETKLGSNAVVSGKGVPTTTTRPWLISDPNSSSVDKLAAALEHHHHHH
At5g37780	CaM1	pet15b	NcoI-BamHI	No	16.9	yes	4.14	gaagaagcCatggcggatcaactc	ATCACCTGGATCCAATCACTTAGC	MADQLTDEQISEFKEAFSLFDKDGDGCITTKELGTVMRSLGQNPTEAELQDMINEVDADGNGTIDFPEFLNLMAKKMKDTDSEEELKEAFRVFDKDQNGFISAAELRHVMTNLGEKLTDEEVEEMIREADVDGDGQINYEEFVKIMMAK
At1g22410	DAHPS3	pet23d (+)	NcoI-XhoI	No	53	yes	7.19	caccagctgcttcCATggcgtcggcggcgacg	gatattattataagcTCGAGttatttgattagaggg	MASAATTTPATLTKPVGVNVGKGKWAPESWRTKKALQQPDYPDLAALEAVLETIEAFPPIVFAGEARLLEERLGQAAMGEAFLLQGGDCAESFKEFNANNIRDTFRILLQMGAVLMFGGQVPVVKVGRMAGQFAKPRSDSFEEKDGVKLPSYRGDNINGDAFDSKSRIPDPQRMIRAYCQSAATLNLLRAFATGGYAAMQRVTQWNLDFTERSEQGDRYRELANRVDEALGFMHAAGLTLDHPIMQTTDFWTSHECLLLPYEQSLTRLDSTSGLYYDCSAHMIWVGERTRQLDGAHVEFLRGVANPLGIKVSDKMDPKELVKLIEILNADNKPGRITIITRMGAENMRVKLPHLIREVRRAGQIVTWVSDPMHGNTIKAPCGLKTRPFDAILAEVRAFF…
