# Supplementary figures and images for: Complementary biochemical approaches applied to the identification of plastidial calmodulin-binding proteins
Source: Royal Society of Chemistry journal article supplement (doi:10.1039/c3mb00004d), 2013-03-12

## *In vitro* CaM binding assay: rationale

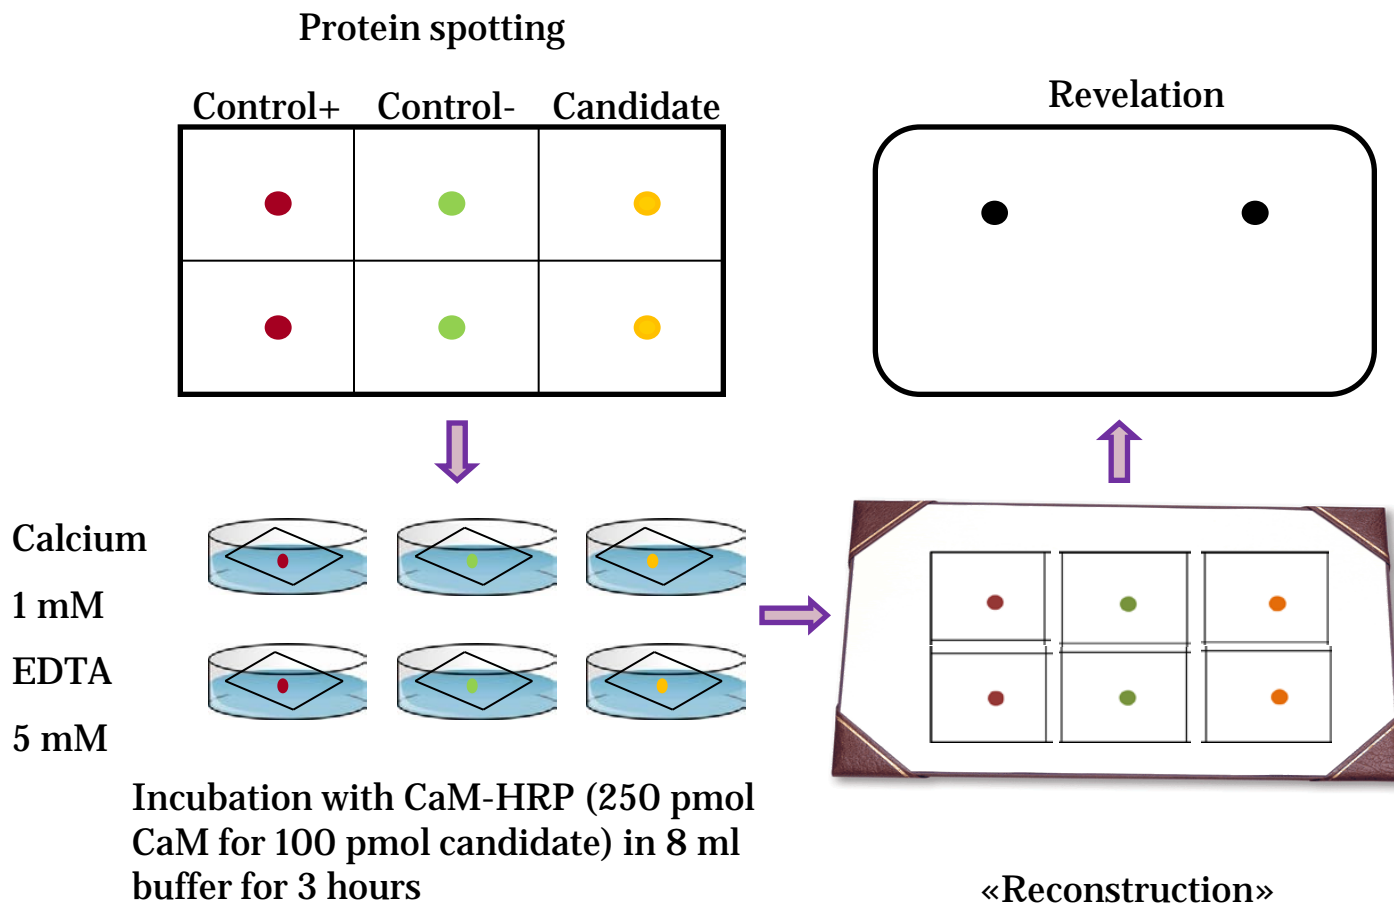

Supplement: c3mb00004d.pdf [file c3mb00004d.pdf]
